## **A single bacterial genus maintains root development in a complex microbiome**

Omri M. Finkel<sup>1,2†</sup>, Isai Salas-González<sup>1,2,3†</sup>, Gabriel Castrillo<sup>1,2†‡</sup>, Jonathan M. Conway<sup>1,2†</sup>, Theresa F. Law<sup>1,2</sup>, Paulo José Pereira Lima Teixeira<sup>1,2α</sup>, Ellie D. Wilson<sup>1,2</sup>, Connor R. Fitzpatrick<sup>1,2</sup>, Corbin D. Jones<sup>1,3,4,5,6,7</sup>, Jeffery L. Dangl<sup>1,2,3,6,7,8\*</sup>

<sup>1</sup>Department of Biology, University of North Carolina at Chapel Hill, Chapel Hill, North Carolina, United States of America.

<sup>2</sup>Howard Hughes Medical Institute, University of North Carolina at Chapel Hill, Chapel Hill, North Carolina, United States of America.

<sup>3</sup>Curriculum in Bioinformatics and Computational Biology, University of North Carolina at Chapel Hill, Chapel Hill, North Carolina, United States of America.

<sup>4</sup>Department of Genetics, University of North Carolina at Chapel Hill, Chapel Hill, North Carolina, United States of America.

<sup>5</sup>Lineberger Comprehensive Cancer Center, University of North Carolina at Chapel Hill, Chapel Hill, North Carolina, United States of America.

<sup>6</sup>Carolina Center for Genome Sciences, University of North Carolina at Chapel Hill, Chapel Hill, North Carolina, United States of America.

<sup>7</sup>Curriculum in Genetics and Molecular Biology, University of North Carolina at Chapel Hill, Chapel Hill, North Carolina, United States of America.

<sup>8</sup>Department of Microbiology and Immunology, University of North Carolina at Chapel Hill, Chapel Hill, North Carolina, United States of America.

\*Correspondence to: [dangl@email.unc.edu](mailto:dangl@email.unc.edu)

†These authors contributed equally to this work.

‡Current address: Future Food Beacon of Excellence and the School of Biosciences, University of Nottingham, Sutton Bonington, United Kingdom

αCurrent address: Department of Biology, "Luiz de Queiroz" College of Agriculture (ESALQ), University of São Paulo (USP), Piracicaba, São Paulo, Brazil

## 1 **Abstract**

2 Plants grow within a complex web of species interacting with each other and with the  
3 plant. Many of these interactions are governed by a wide repertoire of chemical signals,  
4 and the resulting chemical landscape of the rhizosphere can strongly affect root health  
5 and development. To understand how microbe-microbe interactions influence root  
6 development in *Arabidopsis*, we established a model system for plant-microbe-microbe-  
7 environment interactions. We inoculated seedlings with a 185-member bacterial  
8 synthetic community (SynCom), manipulated the abiotic environment, and measured  
9 bacterial colonization of the plant. This enabled classification of the SynCom into four  
10 modules of co-occurring strains. We deconstructed the SynCom based on these  
11 modules, identifying microbe-microbe interactions that determine root phenotypes.  
12 These interactions primarily involve a single bacterial genus, *Variovorax*, which  
13 completely reverts severe root growth inhibition (RGI) induced by a wide diversity of  
14 bacterial strains as well as by the entire 185-member community. We demonstrate that  
15 *Variovorax* manipulate plant hormone levels to balance this ecologically realistic root  
16 community's effects on root development. We identify a novel auxin degradation operon  
17 in the *Variovorax* genome that is necessary and sufficient for RGI reversion. Therefore,  
18 metabolic signal interference shapes bacteria-plant communication networks and is  
19 essential for maintaining the root's developmental program. Optimizing the feedbacks  
20 that shape chemical interaction networks in the rhizosphere provides a promising new  
21 ecological strategy towards the development of more resilient and productive crops.

## 22 **Main**

23 Plant phenotypes, and ultimately fitness, are influenced by the microbes living in close  
24 association with them<sup>1-4</sup>. These microbes, collectively termed the plant microbiota,  
25 assemble based on plant- and environmentally-derived cues<sup>5,6</sup> resulting in myriad plant-  
26 microbe interactions. Beneficial and detrimental microbial effects on plants can be either  
27 direct<sup>1,7-10</sup>, or an indirect consequence of microbe-microbe interactions<sup>3,11</sup>. The  
28 contribution of microbe-microbe interactions within the microbiota to community  
29 assembly and to the community's effect on the host is unknown, and it is therefore  
30 unclear to what extent binary plant-microbe interactions hold in complex ecological  
31 contexts. While antagonistic microbe-microbe interactions are known to play an  
32 important role in shaping plant microbiota and protecting plants from pathogens<sup>3</sup>,  
33 another potentially significant class of interactions is metabolic signal interference<sup>8,12</sup>:  
34 rather than direct antagonism, microbes interfere with the delivery of chemical signals  
35 produced by other microbes, altering plant-microbe signaling<sup>13-15</sup>.  
36 Plant hormones, in particular auxins, are both produced and degraded by an abundance  
37 of plant-associated microbes<sup>16-19</sup>. Microbially-derived auxins can have effects on plants  
38 ranging from growth-promoting to disease-inducing, depending on context and  
39 concentration<sup>20</sup>. The plant's intrinsic root developmental patterns are dependent on  
40 finely calibrated auxin and ethylene concentration gradients with fine differences across  
41 tissues and cell types<sup>21</sup>, and it is not known how the plant integrates exogenous,  
42 microbially-derived auxin fluxes into its developmental plan.

43

44 Here we apply a synthetic community (SynCom) that is reasonably representative of wild  
45 soil root-associated microbiomes, to axenic plants to ask how microbe-microbe

46 interactions shape plant root development. We use plant colonization patterns across  
47 16 abiotic conditions to guide stepwise deconstruction of the SynCom, leading to the  
48 identification of multiple levels of microbe-microbe interactions that interfere with the  
49 additivity of bacterial effects on root development. We demonstrate that a single  
50 bacterial genus, *Variovorax*, is required for maintaining the root's intrinsically controlled  
51 developmental program by tuning its chemical landscape. Finally, we identify the locus  
52 conserved across *Variovorax* strains that is responsible for this phenotype.

53

#### 54 **Consistent community assembly across environmental conditions**

55 To model plant-microbiota interactions in a fully controlled setting, we established a  
56 plant-microbiota microcosm representing the native bacterial root-derived microbiota on  
57 agar plates. We inoculated 7-day-old seedlings with a defined 185-member bacterial  
58 SynCom (Extended Data Fig. 1a, Supplementary Table 1) composed of genome-  
59 sequenced isolates obtained from surface sterilized *Arabidopsis* roots (Methods 1). The  
60 composition of this SynCom captures the diversity of Actinobacteria, Proteobacteria and  
61 Bacteroidetes; the three major root-enriched phyla<sup>6,22,23</sup>; and Firmicutes, which are  
62 abundant in plant-associated culture collections<sup>24</sup>. To test the robustness of microbiota  
63 assembly to the abiotic environment, we exposed this microcosm to each of 16 different  
64 abiotic contexts by manipulating one of four variables (salinity, temperature, phosphate  
65 concentration, and pH). We measured SynCom composition in root, shoot and agar  
66 fractions 12 days post-inoculation using 16S rRNA amplicon sequencing.

67

68 The composition of the resulting root and shoot microbiota recapitulated phylum-level

69 plant enrichment patterns seen in soil-planted *Arabidopsis thaliana*, with comparable  
70 proportions of Proteobacteria, Bacteroidetes and Actinobacteria (Extended Data Fig.  
71 1b). Firmicutes, which are not plant-enriched, were reduced to <0.1% of the relative  
72 abundance. We observed similar patterns in seedlings grown in sterilized potting soil<sup>25</sup>  
73 inoculated with the same SynCom (Methods 2). Both relative abundances and plant  
74 enrichment patterns at the unique sequence (USeq)-levels were significantly correlated  
75 between the agar- and soil-based systems, confirming the applicability of the relatively  
76 high-throughput agar-based system as a model for plant microbiota assembly (Extended  
77 Data Fig. 1c).

78  
79 Fraction (substrate, root, shoot) (Extended Data Fig. 1d), explained most (40%) of the  
80 variance across all abiotic variables. Abiotic conditions significantly affected both alpha-  
81 (Extended Data Fig. 1e) and beta-diversity (Fig. 1a). We calculated pairwise correlations  
82 in relative abundance across all samples, and identified four well-defined modules of co-  
83 occurring strains: A, B, C and D (Fig. 1b, Supplementary Table 2). These modules formed  
84 distinct phylogenetically-structured guilds in association with the plant: module A  
85 contained mainly Gammaproteobacteria and was predominantly more abundant in the  
86 substrate than in the seedling; module B contained mainly low-abundance Firmicutes,  
87 with no significant seedling enrichment trend; modules C and D were composed mainly  
88 of Alphaproteobacteria and Actinobacteria, respectively, and showed plant-enrichment  
89 across all abiotic conditions (Figure 1a, Supplementary Table 2). Both  
90 Alphaproteobacteria (module C) and Actinobacteria (module D) are consistently plant-  
91 enriched across plant species<sup>23</sup>, suggesting that these clades contain plant-association

92 traits that are deeply rooted in their evolutionary histories.

93

#### 94 **Root development is controlled by multiple microbe-microbe interactions**

95 We next asked whether the different modules of co-occurring strains play different roles  
96 in determining plant phenotypes (Methods 3). We inoculated seedlings with SynComs  
97 composed of modules A, B, C and D singly, or in all six possible pairwise module  
98 combinations, and imaged the seedlings 12 days post-inoculation. We observed strong  
99 primary root growth arrest in seedlings inoculated with plant-enriched modules C or D  
100 (Fig. 2a, c). Root growth inhibition (RGI) did not occur in seedlings inoculated with  
101 modules A or B, which do not contain plant-enriched strains (Fig. 2a, Supplementary  
102 Table 3). To test whether the root phenotype derived from each module is an additive  
103 outcome of its individual constituents, we inoculated seedlings in mono-association with  
104 each of the 185 SynCom members (Methods 4). We observed that 34 taxonomically  
105 diverse strains, distributed across all four modules, induced RGI (Fig. 2b, Extended Data  
106 Fig. 2, Supplementary Table 4). However, neither the full SynCom nor derived SynComs  
107 consisting of modules A or B exhibited RGI (Fig. 2a). Thus, binary plant-microbe  
108 interactions were not predictive of interactions in this complex community context.

109

110 In seedlings inoculated with module pairs, we observed an epistatic interaction: in the  
111 presence of module A, RGI caused by modules C and D was reverted (Fig. 2a). Thus,  
112 through deconstructing the SynCom into four modules, we found that bacterial effects  
113 on root development are governed by multiple levels of microbe-microbe interactions.  
114 This is exemplified by at least four instances: within modules A or B and between module

115 A and modules C or D. Since three of these interactions involve module A, we predicted  
116 that this module contains strains that strongly attenuate RGI, preserving stereotypic root  
117 development.

118

119 ***Variovorax* are necessary and sufficient to maintain stereotypic plant root**  
120 **development within complex microbiota**

121 To identify strains within module A responsible for intra- and inter-module RGI  
122 attenuation, we reduced our system to a tripartite plant-microbe-microbe system  
123 (Methods 5). We individually screened the 18 non-RGI strains from module A for their  
124 ability to attenuate RGI caused by representative strains from all four modules. We found  
125 that all strains from a single genus, *Variovorax* (Family Comamonadaceae), suppressed  
126 RGI caused by representative RGI-inducing strains from module C (*Agrobacterium*  
127 MF224) and module D (*Arthrobacter* CL28; Fig. 2d, Supplementary Table 5). The strains  
128 from modules A (*Pseudomonas* MF48) and B (*Bacillus* MF107), were not suppressed by  
129 *Variovorax*, but rather by two closely related *Burkholderia* strains (CL11, MF384). A  
130 similar pattern was observed when we screened three selected RGI-suppressing  
131 *Variovorax* strains (CL14, MF160) and *Burkholderia* CL11, against a diverse set of RGI-  
132 inducers. *Variovorax* attenuated 13 of the 18 RGI-inducers tested (Fig. 2e,  
133 Supplementary Table 5).

134

135 To test whether RGI induction and repression observed on agar occur in soil as well, we  
136 germinated *Arabidopsis* on sterile soil inoculated with an RGI-suppressor-inducer pair  
137 composed of the RGI-inducer *Arthrobacter* CL28 and the RGI-attenuator *Variovorax*

138 CL14 (Methods 2). As expected, *Arthrobacter* CL28 induced RGI which was reverted by  
139 *Variovorax* CL14 in soil (Fig. 2f, Supplementary Table 6). We generalized this observation  
140 by showing that *Variovorax*-mediated RGI attenuation extended to tomato seedlings,  
141 where *Variovorax* CL14 reverted *Arthrobacter* CL28-mediated RGI (Extended Data Fig.  
142 3a, Supplementary Table 7, Methods 6). Finally, we tested whether the RGI-suppressor  
143 strains maintain their capacity to attenuate RGI in the context of the full 185-member  
144 community (Methods 7). We compared the root phenotype of seedlings exposed to  
145 either the full SynCom or to the same community dropping-out all ten *Variovorax* strains  
146 and/or all six *Burkholderia* strains present in this SynCom (drop-out system, Fig. 3a, b,  
147 c). We found that *Variovorax* are necessary and sufficient to revert RGI within the full  
148 community (Fig. 3b, c, Supplementary Table 8). Further, the presence of *Variovorax*  
149 increases the plant's total root network length (Extended Data Fig. 3b). This result was  
150 robust across a range of substrates, including soil, and under various biotic and abiotic  
151 contexts (Fig. 3d, e, f, Extended Data Fig. 3b, 4, Supplementary Table 8; Methods 8, 9).  
152  
153 To ascertain the phylogenetic breadth of the *Variovorax* ability to attenuate RGI, we  
154 tested additional *Variovorax* strains from across the genus' phylogeny (Extended Data  
155 Fig. 5, Supplementary Table 1; Methods 10). All 19 tested *Variovorax* reverted RGI  
156 induced by *Arthrobacter* CL28 (Methods 11). A strain from the nearest plant-associated  
157 outgroup to this genus, *Acidovorax* Root219<sup>26</sup>, did not revert RGI (Extended Data Fig. 5,  
158 Supplementary Table 9). Thus, all tested strains representing the broad phylogeny of  
159 *Variovorax* interact with a wide diversity of bacteria to enforce stereotypic root  
160 development within complex communities, independent of biotic or abiotic contexts.



161

162 We tested whether *Variovorax* attenuate RGI by inhibiting growth of RGI-inducing strains  
163 (Methods 12). We counted colony forming units of the RGI inducer *Arthrobacter* CL28  
164 from roots in the presence or absence of *Variovorax* CL14 and found that CL28  
165 abundance increased in the presence of *Variovorax* CL14 (Extended Data Fig. 6,  
166 Supplementary Table 10). To test whether *Variovorax* modulates bacterial abundances  
167 in the whole community, we compared the bacterial relative abundance profiles in  
168 seedlings colonized with the full SynCom to that colonized with the *Variovorax* drop-out  
169 community (Methods 8d). We found no changes in the abundances of RGI-inducing  
170 strains in response to the *Variovorax* drop-out (Fig. 3g). Notably, *Variovorax* account for  
171 only ~1.5% of the root community (Fig. 3h). These results rule out the possibility that  
172 *Variovorax* enforce stereotypic root development by antagonizing or outcompeting RGI-  
173 inducers.

174

### 175 ***Variovorax* maintain root development through auxin and ethylene manipulation**

176 To study the mechanisms underlying bacterial effects on root development, we analysed  
177 the transcriptomes of seedlings colonized for 12 days with the RGI-inducing strain  
178 *Arthrobacter* CL28 and the RGI-attenuator strain *Variovorax* CL14, either in mono-  
179 association with the seedling or in a tripartite combination (Fig. 2f; Methods 13). We also  
180 performed RNA-Seq on seedlings colonized with the full SynCom (no RGI) or the  
181 *Variovorax* drop-out SynCom (RGI; Fig. 3a). Eighteen genes were significantly induced  
182 only under RGI conditions across both experiments (Fig. 4a, b, Supplementary Table 11).  
183 Seventeen of these are co-expressed genes with proposed functions related to the root

184 apex<sup>27</sup> (Fig 4b, Extended Data Fig. 7). The remaining gene is indole-3-acetic acid-amido  
185 synthetase GH3.2, which conjugates excess amounts of the plant hormone auxin and is  
186 a robust marker for late auxin responses<sup>28,29</sup> (Fig. 4b). Production of auxins is a well-  
187 documented mechanism by which bacteria modulate plant root development<sup>13</sup>. Indeed,  
188 the top 12 auxin-responsive genes from an RNA-Seq study examining acute auxin  
189 response in *Arabidopsis*<sup>28</sup> exhibited an average transcript increase in seedlings exposed  
190 to our RGI-inducing conditions (Fig. 4c and Supplementary Table 12). We hypothesized  
191 that RGI attenuation by *Variovorax* is likely mediated by interference with bacterially-  
192 produced auxin signalling.

193

194 We asked whether RGI-attenuation by *Variovorax* is directly and exclusively related to  
195 auxin signalling (Methods 14). Besides auxin, other small molecules cause RGI. These  
196 include the plant hormones ethylene<sup>30</sup> and cytokinin<sup>31</sup>; and microbial-associated  
197 molecular patterns (MAMPs) including the flagellin-derived peptide flg22<sup>32</sup>. We tested  
198 the ability of diverse *Variovorax* strains and of the *Burkholderia* strain CL11 to revert RGI  
199 induced by auxins (Indole-3-acetic acid [IAA] and the auxin analogue 2,4-  
200 Dichlorophenoxyacetic acid [2,4-D]), ethylene (the ethylene precursor 1-  
201 Aminocyclopropane-1-carboxylic acid [ACC]), cytokinins (Zeatin, 6-Benzylaminopurine)  
202 and flg22 peptide (Fig. 4d). All tested *Variovorax* suppressed RGI induced by IAA or ACC  
203 (Fig. 4d, Supplementary Table 13), with the exception of *Variovorax* YR216 which did not  
204 suppress ACC-induced RGI and does not contain an ACC deaminase gene (Extended  
205 Data Fig. 5a), a plant growth-promoting feature associated with this genus<sup>30</sup>.  
206 *Burkholderia* CL11 only partially reverted ACC-induced RGI. None of the *Variovorax*

207 attenuated RGI induced by 2,4-D, by flg22 or by cytokinins, indicating that *Variovorax*  
208 revert RGI induction by interfering with auxin and/or ethylene signalling. Furthermore,  
209 this function is mediated by recognition of auxin by *Variovorax* and not by the plant auxin  
210 response per se, since the auxin response (RGI) induced by 2,4-D is not reverted. Indeed,  
211 we found that *Variovorax* CL14 degrades IAA in culture (Extended Data Fig. 8a; Methods  
212 15) and quenches fluorescence of the Arabidopsis auxin reporter line *DR5::GFP* caused  
213 by the RGI inducer *Arthrobacter* CL28 (Fig. 4e, Extended Data Fig. 8b, Supplementary  
214 Table 14; Methods 17).

215  
216 To ascertain the roles of auxin and ethylene perception by the plant in responding to  
217 RGI-inducers, we used the auxin-insensitive *axr2-1* mutant<sup>33</sup>, combined with a  
218 competitive inhibitor of ethylene receptors, 1-Methylcyclopropene (1-MCP)<sup>34</sup>, (Methods  
219 17). We inoculated wild type seedlings and the *axr2-1* mutants, treated or not with 1-  
220 MCP, with the RGI-inducing *Arthrobacter* CL28 or the *Variovorax* drop-out SynCom  
221 (Supplementary Table 15). We observed in both cases that bacterial RGI is reduced in  
222 *axr2-1* and 1-MCP-treated wild type seedlings, and is further reduced in doubly-  
223 insensitive 1-MCP-treated *axr2-1* seedlings, demonstrating an additive effect of auxin  
224 and ethylene on bacterially-induced RGI (Fig. 4f). Thus, a complex SynCom can induce  
225 severe morphological changes in root phenotypes via both auxin- and ethylene-  
226 dependent pathways, and both are reverted when *Variovorax* are present.

227  
228 **An auxin catabolism operon in *Variovorax* is required for maintenance of**  
229 **stereotypic plant root development**

230 To identify the bacterial mechanisms involved in RGI-attenuation, we compared the  
231 genomes of the 10 *Variovorax* strains in the SynCom to the genomes of the other 175  
232 SynCom members. We identified a list of 947 orthogroups that were rare (< 5%  
233 prevalence) in the 175 SynCom members and core (100% prevalence) across the 10  
234 *Variovorax* strains. We collapsed these orthogroups into hotspots (regions of physically  
235 continuous orthogroups) and focused on the 12 hotspots that contained at least 10  
236 *Variovorax*-unique orthogroups (Extended Data Fig. 9a, Methods 18 and Supplementary  
237 Table 16). Hotspot 33 contains genes with low sequence homology (average ~30 %  
238 identity) to the genes *iacCDEF* of the *Paraburkholderia phytofirmans* PsJN IAA-  
239 degradation *iac* operon<sup>19</sup> but lacks *iacAB* which were shown to be necessary for  
240 *Paraburkholderia* growth on IAA<sup>18</sup> (Fig. 5a). To test whether the hotspots we identified  
241 are responsive to RGI-inducing bacteria, we analysed the transcriptome of *Variovorax*  
242 CL14 in monoculture and in co-culture with the RGI-inducing strain *Arthrobacter* CL28  
243 (Methods 19). We observed extensive transcriptional reprogramming of *Variovorax* CL14  
244 when co-cultured with *Arthrobacter* CL28 (Supplementary Table 17). Among the 12  
245 hotspots we identified, the genes in hotspot 33 were the most highly upregulated (Fig.  
246 5a, Extended Data Fig. 9b, Methods 19). We thus hypothesized that hotspot 33 contains  
247 an uncharacterized auxin degradation operon.

248  
249 In parallel, we constructed a *Variovorax* CL14 genomic library in *E. coli* with >12.5 kb  
250 inserts in the broad host range vector *pBBR1-MCS2*, and screened the resulting *E. coli*  
251 clones for auxin degradation (Methods 20). Two clones from the approximately 3,500  
252 screened degraded IAA (Fig. 5a Vector 1 and Vector 2, Fig. 5b, Methods 20b). The

253 *Variovorax* CL14 genomic inserts in both of these clones contained portions of hotspot  
254 33 (Fig. 5a, Extended Data Fig. 9). The overlap common to these clones contained 9  
255 genes, among them the weak homologs to *Paraburkholderia iacCDE*. To test whether  
256 this genomic region is sufficient to revert RGI in the plant, we transformed a relative of  
257 *Variovorax*, *Acidovorax* Root219 that does not cause or revert RGI (Extended Data Fig.  
258 5), with the shorter functional insert containing Vector 2 (V2) or with an empty vector (EV).  
259 We inoculated the resulting gain-of-function strain, *Acidovorax* Root219::V2 or the  
260 control *Acidovorax* Root219::EV onto plants treated with IAA or inoculated with the RGI  
261 strain *Arthrobacter* CL28. *Acidovorax* Root219::V2 fully reverted IAA-induced RGI (Fig.  
262 5c) and partially reverted *Arthrobacter* CL28-induced RGI, despite colonizing roots at  
263 significantly lower numbers than *Variovorax* CL14 (Fig.5d, Supplementary table 18).  
264 Critically, we deleted hotspot 33 from *Variovorax* CL14 (Fig. 5a) to test whether this  
265 putative operon is necessary for RGI-reversion. The resulting strain *Variovorax*  
266 CL14 $\Delta$ HS33 did not degrade IAA in culture (Fig. 5b) and did not revert IAA-induced (Fig.  
267 5c) or *Arthrobacter* CL28-induced (Fig. 5d) RGI. Thus, this *Variovorax*-specific gene  
268 cluster is necessary for the RGI-suppression phenotype and auxin degradation. It is thus  
269 the critical genetic locus required by *Variovorax* to maintain stereotypic root development  
270 in the context of a phylogenetically diverse microbiome.

271

## 272 **Conclusions**

273 Signalling molecules and other secondary metabolites are adaptations that allow  
274 microbes to survive competition for primary metabolites. Our results illuminate the  
275 importance of a trophic layer of microbes that utilize these secondary metabolites for

276 their own benefit, while potentially providing the unselected exaptation<sup>35</sup> of interfering  
277 with signalling between the bacterial microbiota and the plant host. Metabolic signal  
278 interference was demonstrated in the case of quorum quenching<sup>15</sup>, degradation of  
279 MAMPs<sup>36</sup> and, indeed, the degradation of bacterially-produced auxin, including among  
280 *Variovorax*<sup>13,14,16</sup>. We have shown here that the metabolic homeostasis enforced by the  
281 presence of *Variovorax* in a phylogenetically diverse, realistic synthetic community allows  
282 the plant to maintain its developmental program within a chemically complex matrix.  
283 *Variovorax* were recently found to have the rare property of improved plant-colonization  
284 upon late arrival to an established community, as opposed to arriving together with the  
285 other strains in the community<sup>37</sup>, suggesting that *Variovorax* utilize bacterially-  
286 produced/induced rather than plant-derived substrates. Furthermore, via re-analysis of  
287 a recent large-scale time- and spatially-resolved survey of the Arabidopsis root  
288 microbiome<sup>38</sup>, we noted that two *Variovorax*- 16S sequences were found in ~85% and  
289 100% of the sampled sites (among the top 10 most prevalent sequence among  
290 rhizoplane samples, Extended Data Fig. 10). These ecological observations, together  
291 with our results using a reductionist microcosm, reinforce the importance of *Variovorax*  
292 as key players in bacteria-bacteria-plant communication networks required to maintain  
293 stereotypic root development within a complex biochemical ecosystem.

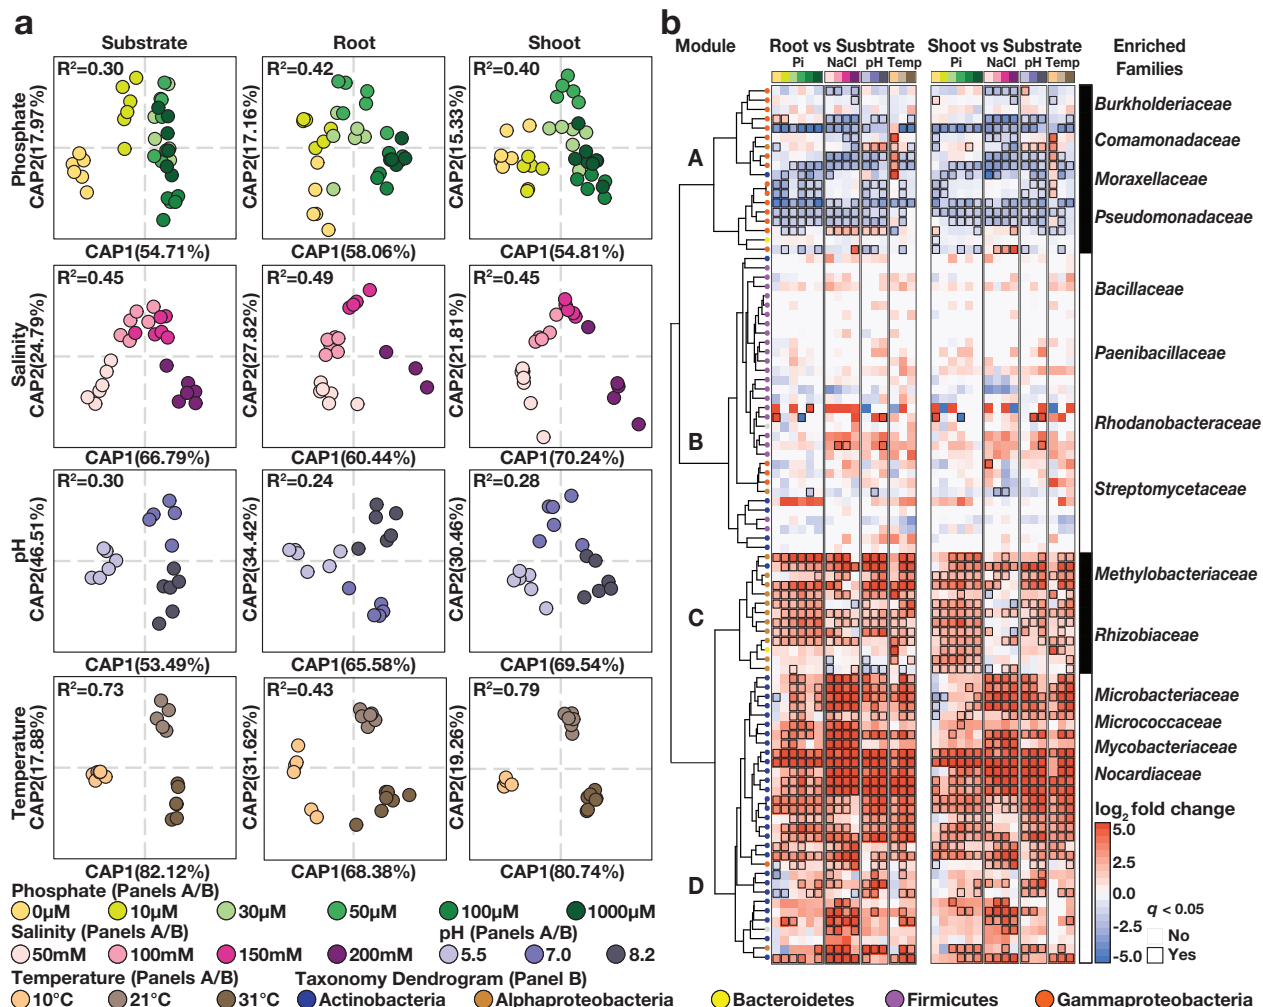

**Fig. 1. Reproducible effects of abiotic conditions on the synthetic community assembly.**

**(a)** Canonical analysis of principal coordinates (CAP) scatterplots showing the influence of each of the four abiotic gradients (phosphate, salinity, pH, temperature) within substrate, root and shoot fractions. PERMANOVA  $R^2$  values are shown within each plot. **(b)** Fraction enrichment patterns of the SynCom across abiotic gradients. Each row represents a USeq. Letters on the dendrogram represent the four modules of co-occurring strains (A, B, C, D). Dendrogram tips are colored by taxonomy. The heatmaps are colored by  $\log_2$  fold changes derived from a fitted GLM. Positive fold changes (red gradient) represent enrichments in plant tissue (root or shoot) compared with substrate, negative fold changes (blue gradient) represent depletion in plant tissue compared with substrate. Comparisons with  $q$ -value  $< 0.05$  are contoured in black. Family bar highlights enriched families within each module.

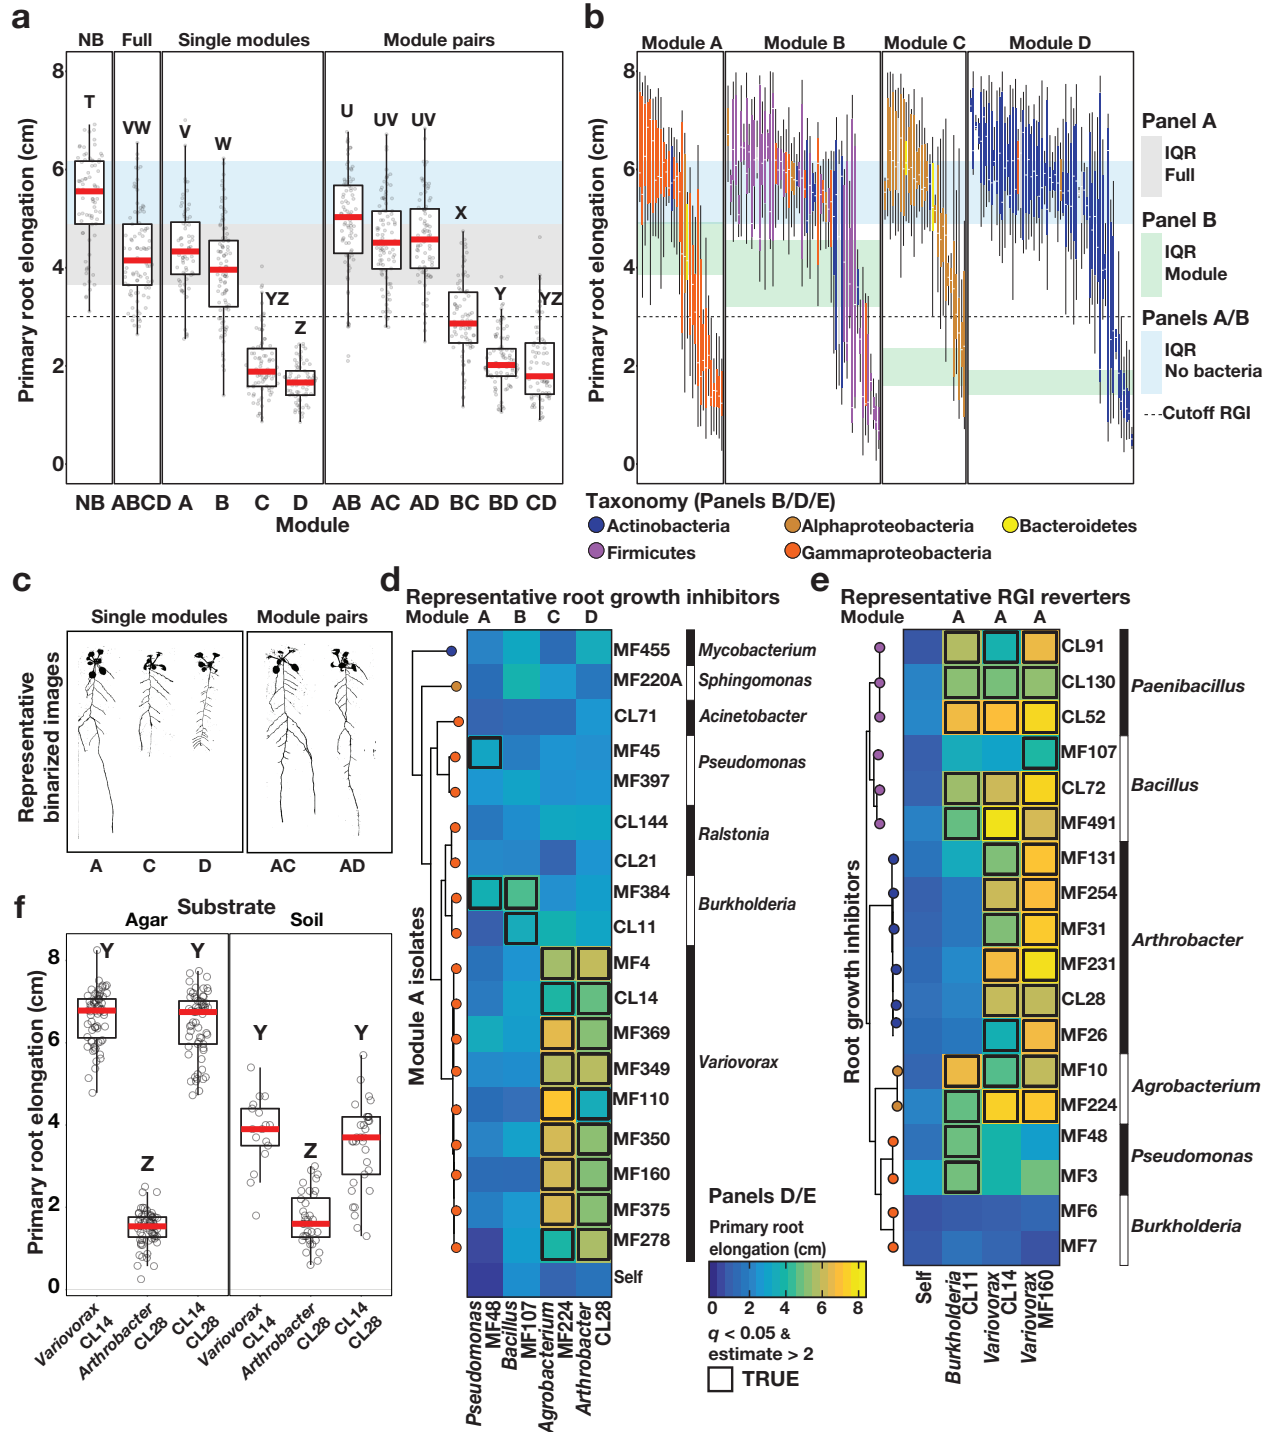



**Fig. 2. Arabidopsis root length is governed by multiple bacteria-bacteria interactions within a community.**

**(a)** Primary root elongation of seedlings grown with no bacteria (NB), with the full 185-member SynCom (Full) or with its subsets: Modules A, B, C and D alone (single modules), as well as all six possible pairwise combination of modules (module pairs). Differences between treatments are denoted using the compact letter display. **(b)** Primary root elongation of seedlings inoculated with single bacterial isolates. Isolates are colored by taxonomy and grouped by module membership. The strips across the panels correspond to the interquartile range (IQR) as noted at far right. The dotted line represents the cutoff used to classify isolates as root growth inhibiting (cutoff RGI). **(c)** Binarized image of representative seedlings inoculated with modules A, C and D, and with module combinations AC and AD. **(d, e)** Heatmaps colored by average primary root elongation of seedlings inoculated with different pairs of bacterial isolates: **(d)** with four representative RGI-inducing strains from each module (columns) alone (Self) or in combination with isolates from module A (rows); **(e)** with eighteen RGI-inducing strains (rows) alone (Self) or in combination with *Burkholderia* CL11, *Variovorax* CL14 or *Variovorax* MF160 (columns). Statistically significant RGI reversions are contoured in black. **(f)** Primary root elongation of uninoculated seedlings (NB) or seedlings inoculated with *Arthrobacter* CL28 and *Variovorax* CL14 isolates individually or jointly. Letters indicate post-hoc significance.

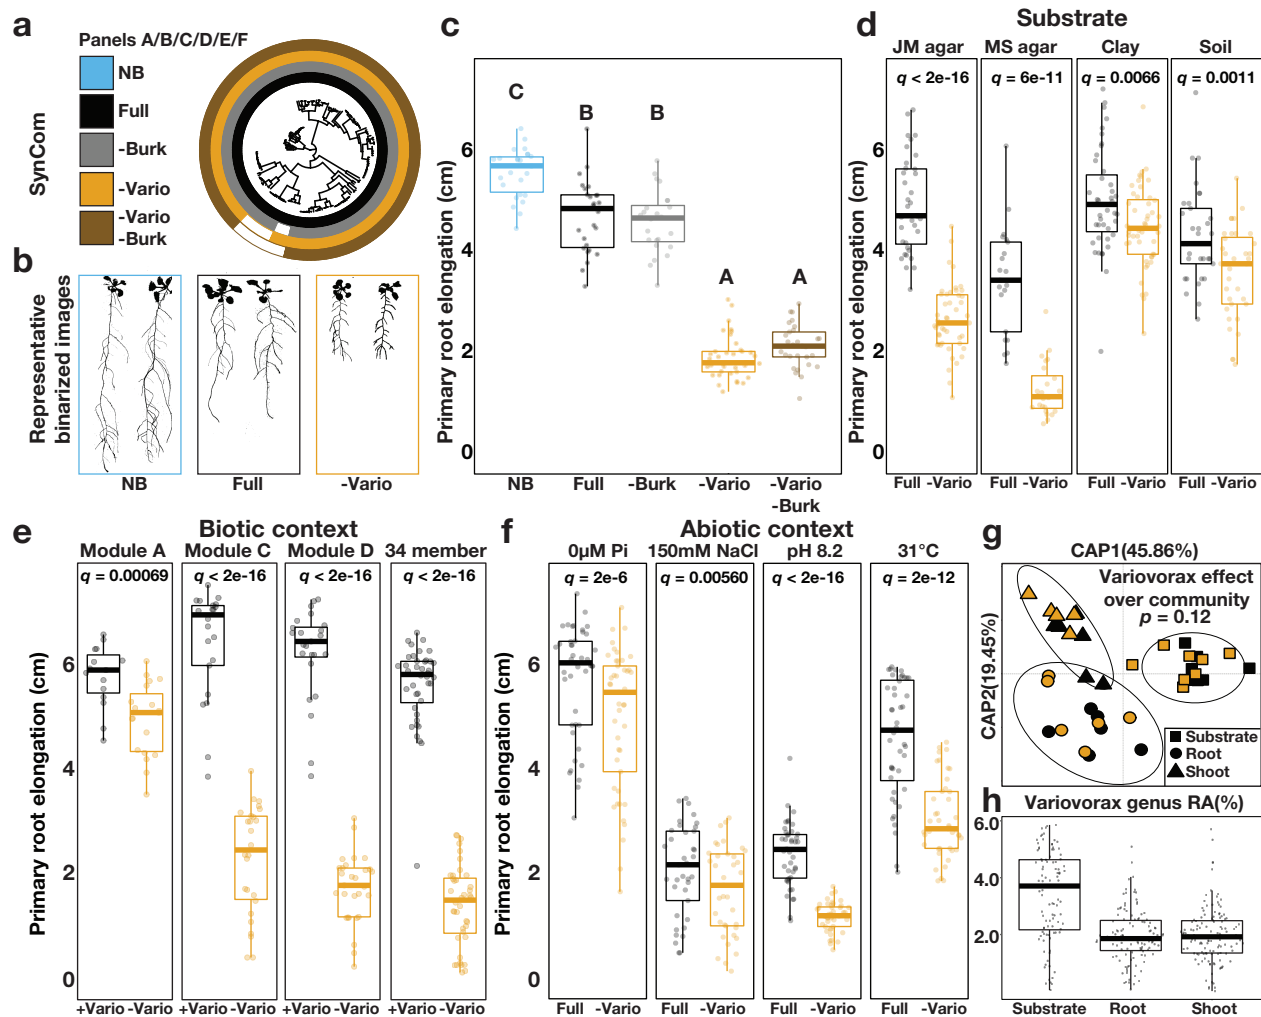

**Fig. 3 Variovorax are necessary and sufficient to maintain stereotypic root development.**

(a) Phylogenetic tree of 185 bacterial isolates. Concentric rings represent isolate composition of each SynCom treatment (-Burk: Burkholderia drop-out, -Vario: Variovorax drop-out). (b) Binarized image of representative uninoculated seedlings (NB), or seedlings with the full SynCom (Full) or the Variovorax drop-out SynCom (-Vario) treatments. (c) Primary root elongation of uninoculated seedlings (NB) or seedlings with the different SynCom treatments. Letters indicate statistical significance. (d) Primary root elongation of seedlings inoculated with the Full SynCom or with the Variovorax drop-out SynCom (-Vario) across different substrates: Johnson Medium (JM agar), Murashige and Skoog (MS agar), or pots with sterilized clay or potting soil. (e) Primary root elongation of seedlings inoculated independently with four compositionally different SynComs (Module A, C, D and 34-member) with (Full) or without (Vario) 10 Variovorax isolates. (f) Primary root elongation of seedlings inoculated with the Full SynCom or with the Variovorax drop-out SynCom (-Vario) across different abiotic conditions: unamended medium (JM agar control), phosphate starvation (JM agar 0 µM Pi), salt stress (JM agar 150 mM NaCl), high pH (JM agar pH 8.2) and high temperature (JM agar 31°C). FDR-corrected p-values are shown within each plot. (g) Canonical analysis of principal coordinates scatterplots comparing community full vs Variovorax drop-out SynComs across all fractions (agar, root, shoot). PERMANOVA p-value is shown. (h) Relative abundance (RA) of the Variovorax genus within the full SynCom across the agar, root and shoot fractions.

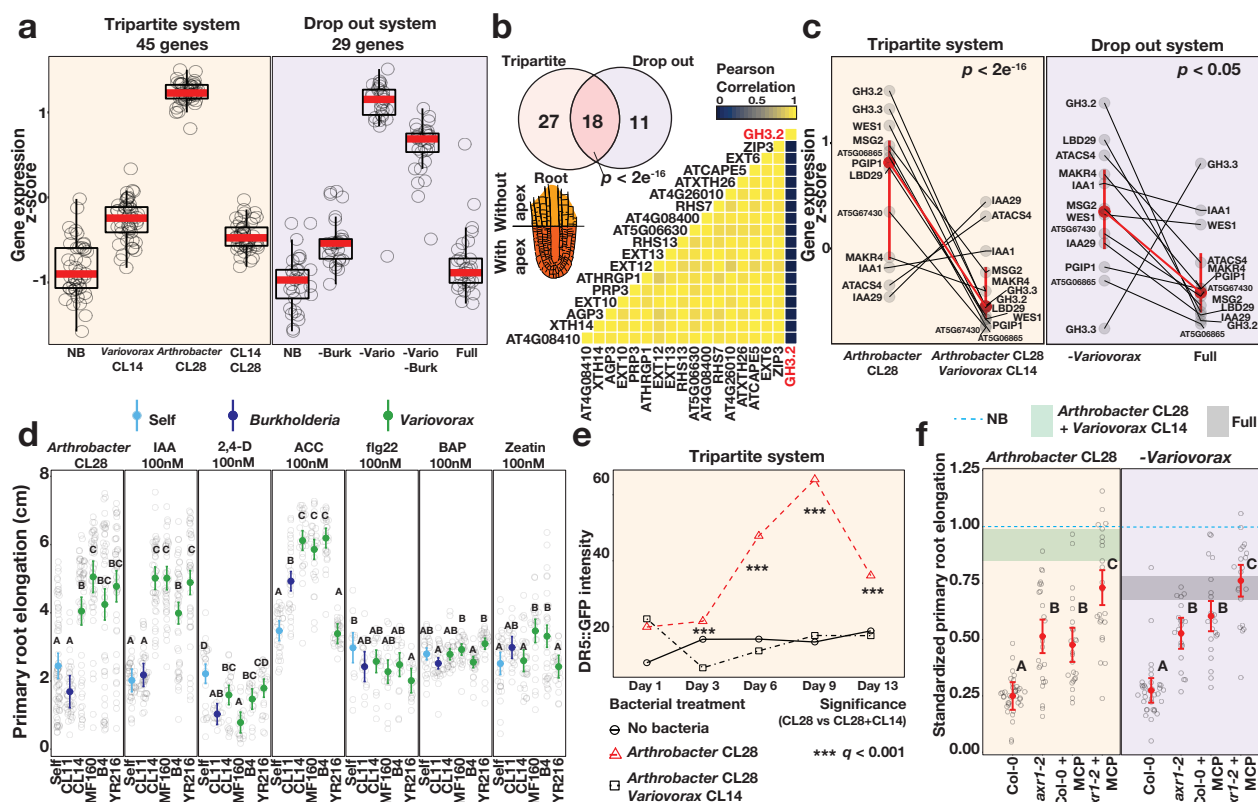

**Fig. 4. Variovorax attenuation of root growth inhibition is related to auxin and ethylene signaling.**

(a) Boxplots showing the average standardized expression of genes induced in seedlings in response to: Left (Tripartite system) Arthrobacter CL28 compared with uninoculated seedlings (NB) or seedlings inoculated with both Arthrobacter CL28 and Variovorax CL14 (CL14 CL28). Right (Drop-out System) Variovorax drop-out SynCom (-Vario) compared to uninoculated seedlings (NB) and to the full SynCom (Full). (b) Venn diagram showing the overlap of enriched genes between the tripartite and drop-out systems. The heatmap shows the pairwise correlation in expression of these 18 genes across tissues. (c) Standardized expression of 12 late-responsive auxin genes across the tripartite and drop-out systems. Each dot represents a gene. Identical genes are connected between bacterial treatments with a black line. Mean expression (95% CI intervals) of the aggregated 12 genes in each treatment is highlighted in red and connected between bacterial treatments with a red line. (d) Primary root elongation of seedlings grown with six hormone or MAMP RGI treatments (panels) individually (Self) or with either Burkholderia CL11 or four Variovorax isolates. Significance between the bacterial treatments is shown using the confidence letter display. (e) GFP intensity of DR5::GFP Arabidopsis seedlings grown with no bacteria, Arthrobacter CL28 and Arthrobacter CL28+Variovorax CL14. Significance within time points is denoted with asterisks. (f) Primary root elongation, standardized to sterile conditions, of wild type (Col-0) auxin unresponsive (axr1-2), ethylene unresponsive (Col-0 + MCP), or auxin/ethylene unresponsive (axr1-2 + MCP) seedlings inoculated with RGI-inducing Arthrobacter CL28 or the Variovorax dropout SynCom (-Variovorax). The blue dotted line marks the relative mean length of uninoculated seedlings. The horizontal shade in each panel corresponds to the interquartile range of seedlings grown with: Arthrobacter CL28+Variovorax CL14, or the full 185-member SynCom including 10 Variovorax isolates (Full SynCom). Differences between treatments are denoted using the compact letter display.

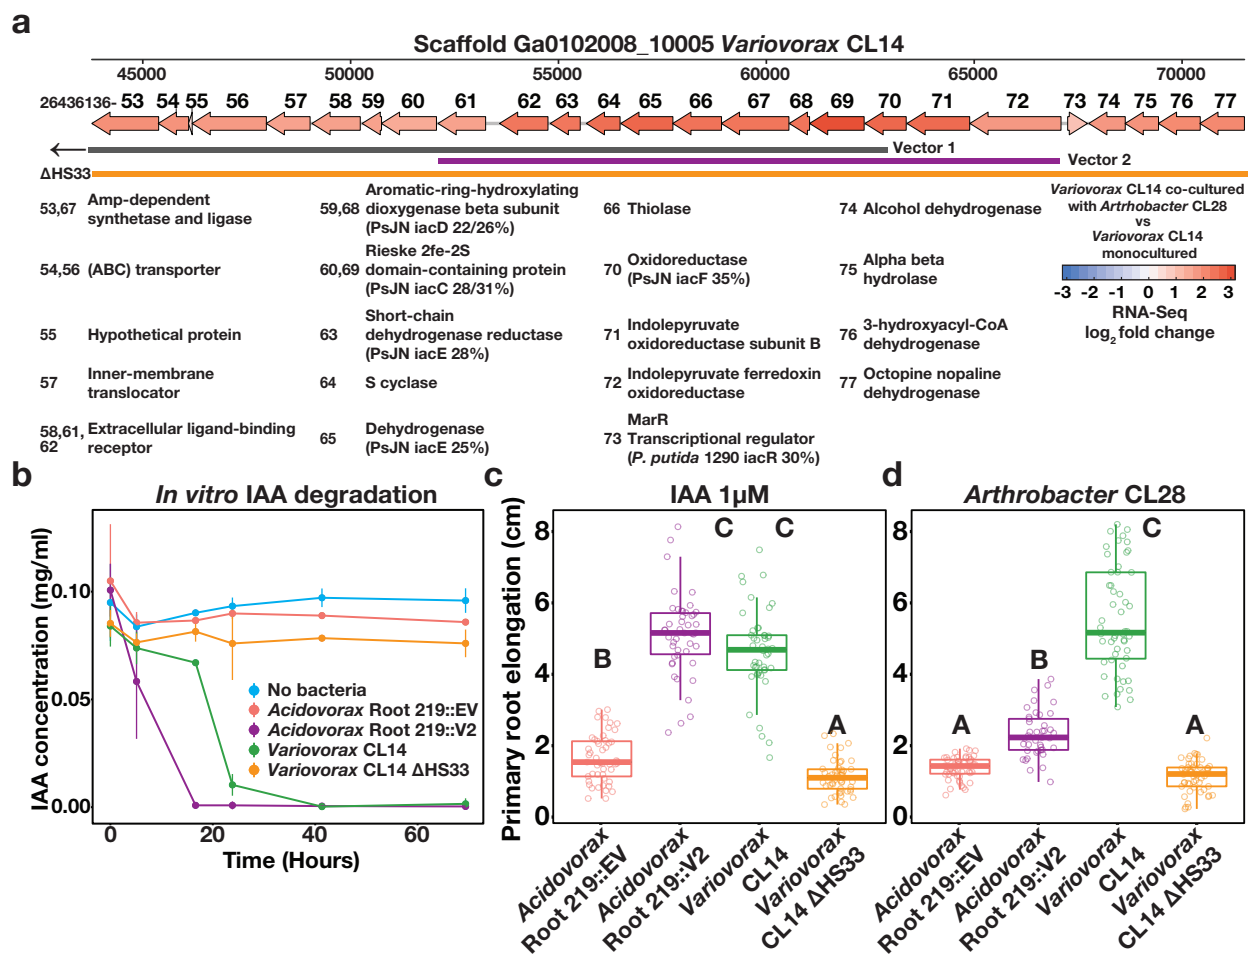

**Fig. 5. An auxin-degrading operon in *Variovorax* is required for maintenance of stereotypical root development**

**(a)** A map of the hotspot 33. Genes are annotated with the last two digits of their IMG gene ID (26436136XX) and their functional assignments are shown below the map, including % identity of any to genes from a known auxin degradation locus. Gene are colored by the log<sub>2</sub> fold change in their transcript abundance in *Variovorax* CL14 co-cultured with *Arthrobacter* CL28 vs *Variovorax* CL14 monoculture. The overlap of this region vectors 1 and 2 and the region knocked out in *Variovorax* CL14 $\Delta$ HS33 are shown below the map. Note that vector 1 extends beyond this region. **(b)** In-vitro degradation of IAA by *Acidovorax* 219::EV, *Acidovorax* 219::V2, *Variovorax* CL14 and *Variovorax* CL14 $\Delta$ HS33. **(c)** Primary root elongation of seedlings treated with IAA alone or inoculated with *Acidovorax* 219::EV, *Acidovorax* 219::V2, *Variovorax* CL14 and *Variovorax* CL14 $\Delta$ HS33. **(d)** Primary root elongation of seedlings inoculated with *Arthrobacter* CL28 in alone or together with *Acidovorax* 219::EV, *Acidovorax* 219::V2, *Variovorax* CL14, or *Variovorax* CL14  $\Delta$ HS33. Letters indicate post-hoc significance.

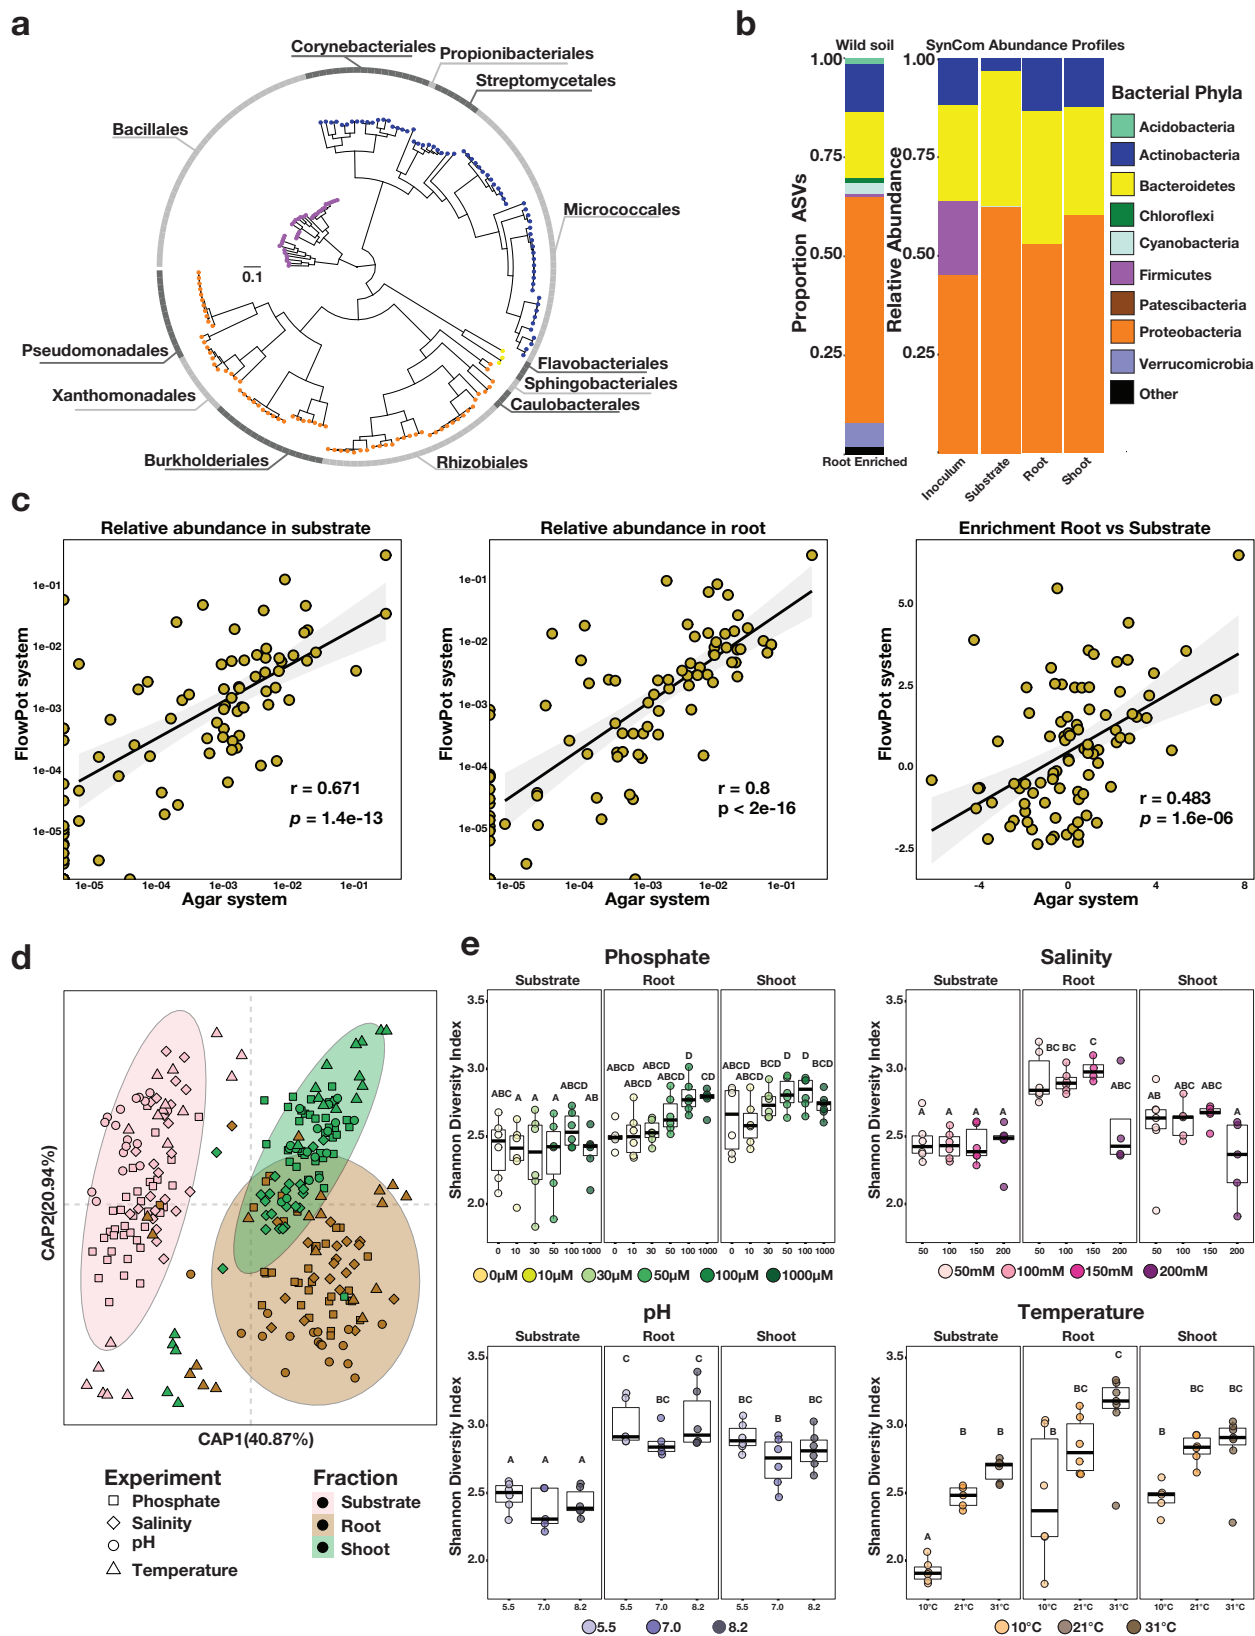

## Extended data Fig. 1

### **Synthetic community resembles the taxonomic makeup of natural communities.**

**(a)** Phylogenetic tree of 185 bacterial genomes included in the synthetic community (SynCom). The tree tips are colored according to phylum. The outer ring shows the distribution of the 12 distinct bacterial orders present in the SynCom. **(b)** The panel on the left (wild soil) shows the proportion of amplicon sequence variants (ASVs) enriched ( $q$ -value  $< 0.1$ ) in the plant root in comparison to soil in a microbiota profiling study from the same soil that SynCom strains were isolated in Levy et al20. In the panel, ASVs are colored according to phylum and the ASVs belonging to Proteobacteria are colored by class. The panel on the right (SynCom panel) represents the relative abundance profiles of bacterial isolates across the initial inoculum, planted agar, root and shoot in plant exposed to the full SynCom. Bacterial isolates are colored based on their phylum, the Proteobacteria are colored according to the class level classification. **(c)** Comparison of SynCom community composition in the agar and soil-based microcosms. (Left) Relative abundance in the substrate (FlowPot system) and (middle) root, (right) as well as root vs substrate enrichment levels are shown. Each dot represents a single USeq. Pearson correlation line, 95% confidence intervals,  $r$  value and  $p$  value are shown for each comparison. **(d)** Canonical analysis of principal coordinates showing the influence of the fraction (planted agar, root, shoot) on the assembly of the bacterial SynCom across the four gradients used in this work (phosphate, salinity, pH, temperature). Different colors differentiate between the fractions and different shapes differentiate between experiments. Ellipses denote the 95% confidence interval of each fraction. **(e)** Abiotic conditions displayed reproducible effects on alpha-diversity. Each panel represents the bacterial alpha-diversity across the different gradient conditions (phosphate, salinity, pH, temperature) and the fractions (planted agar, root, shoot) used in this work. Bacterial alpha-diversity was estimated using Shannon Diversity. Letters represent the results of the post hoc test of an ANOVA model testing the interaction between fraction and abiotic condition.

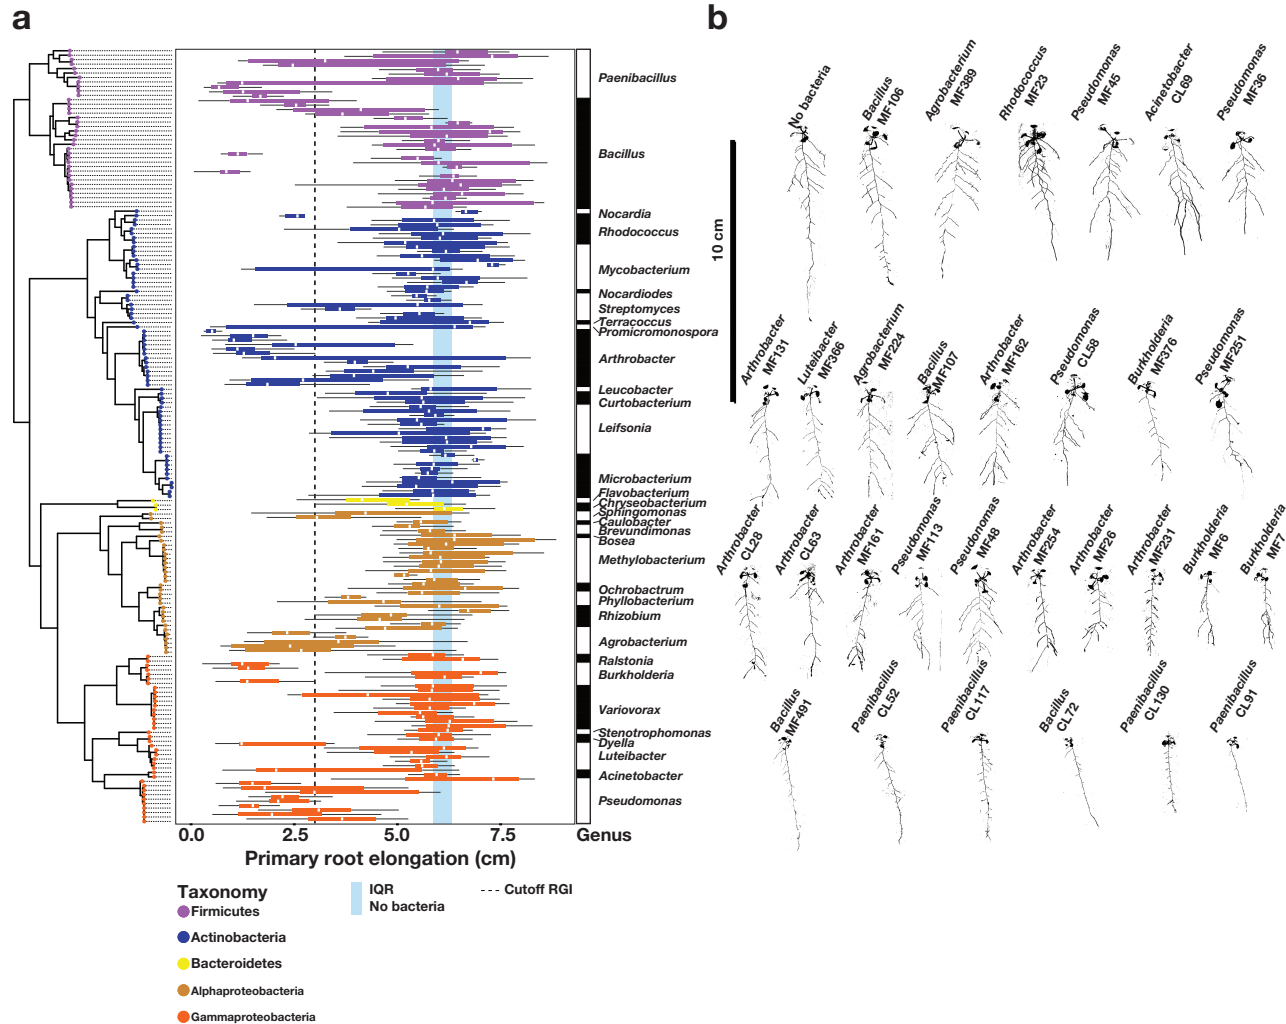

## Extended data Fig. 2

### Root growth inhibition trait is distributed across bacterial phylogeny.

**(a)** Primary root elongation of plants inoculated with single bacterial isolates (one boxplot per isolate). Isolates are ordered according to the phylogenetic tree on the left side of the panel and colored based on their genome-based taxonomy. The vertical blue strips across the panel corresponds to the interquartile range (IQR) of plants grown in sterile conditions. The vertical dotted line represents the 3 cm cutoff used to classify strains as root growth inhibiting (RGI) strains. The bar on the right side of the panel denotes the genus classification of each isolate. **(b)** Binarized image of representative seedlings grown axenically (No bacteria) or with thirty-four RGI strains individually.

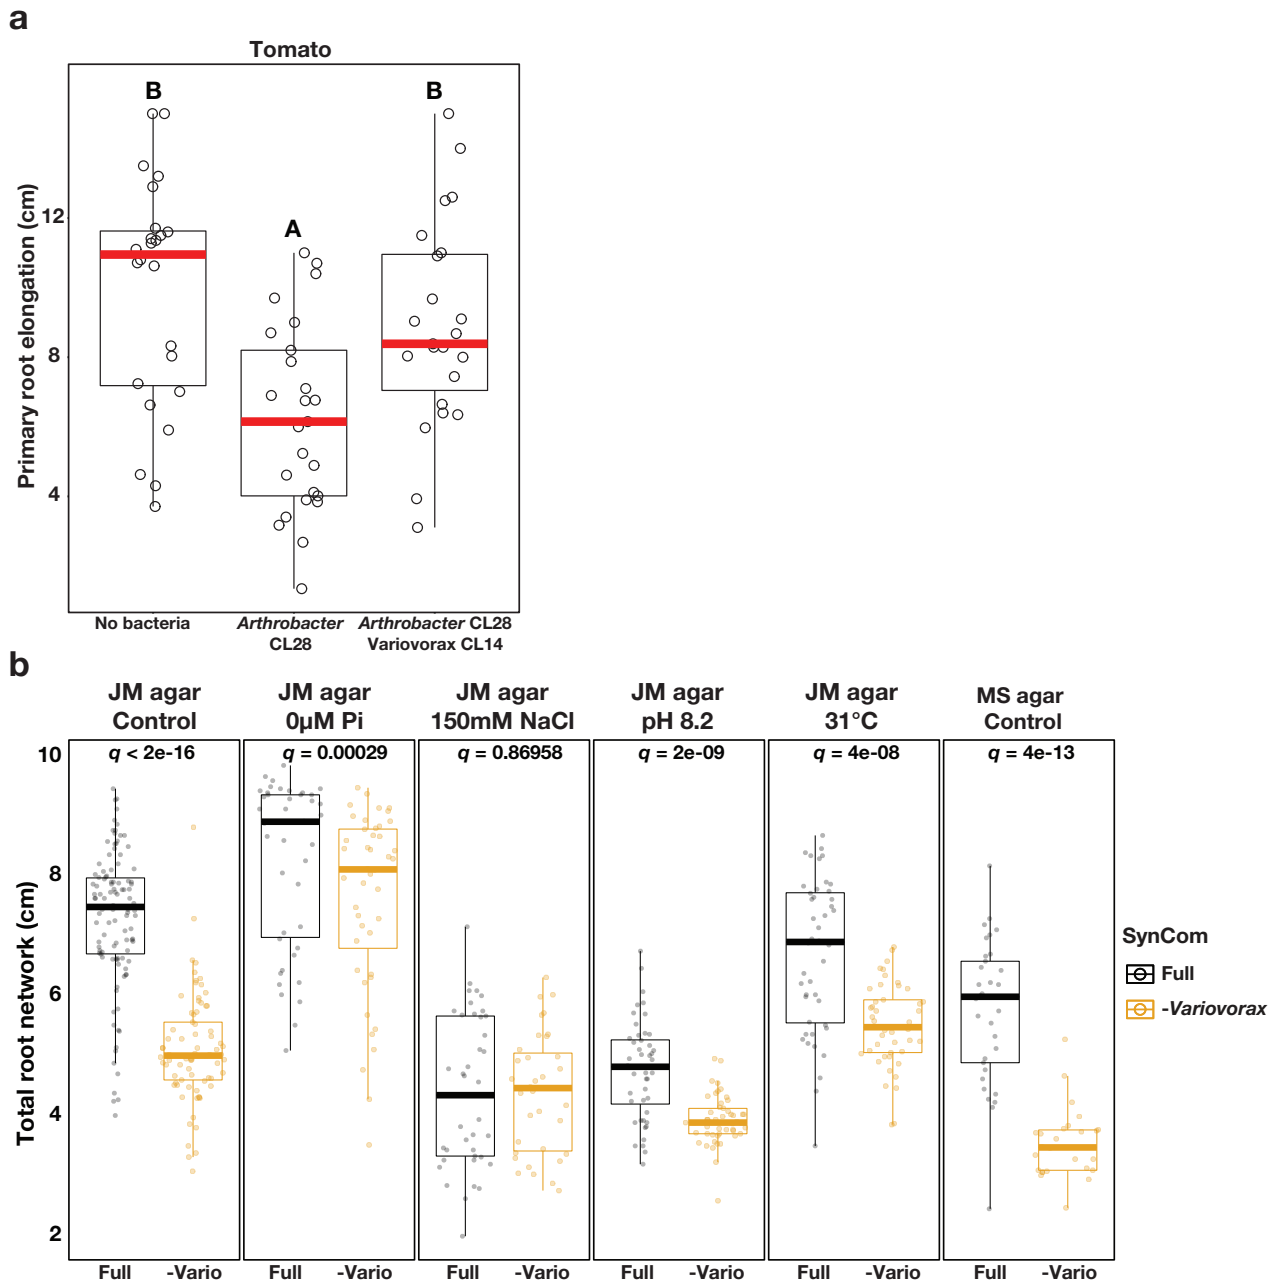

### Extended data Fig. 3

#### Variovorax-mediated reversion of root growth inhibition.

**(a)** Variovorax-mediated reversion of root growth inhibition is maintained in a second plant species. Primary root elongation of uninoculated tomato seedlings (No bacteria) or seedlings inoculated with the *Arthrobacter* CL28 individually or along with *Variovorax* CL14. Letters indicate post hoc significance. **(b)** Total root network of *Arabidopsis* seedlings grown with the full SynCom (Full) or with the full SynCom excluding *Variovorax* (-*Variovorax*) across different abiotic conditions: full medium (JM agar control), phosphate starvation (JM agar 0 uM Pi), salt stress (JM agar 150 mM NaCl), high pH (JM agar pH 8.2) and high temperature (JM agar 31oC) and half Murashige and Skoog medium (MS agar control). Letters indicate statistical significance using ANOVA performed within each experimental condition.



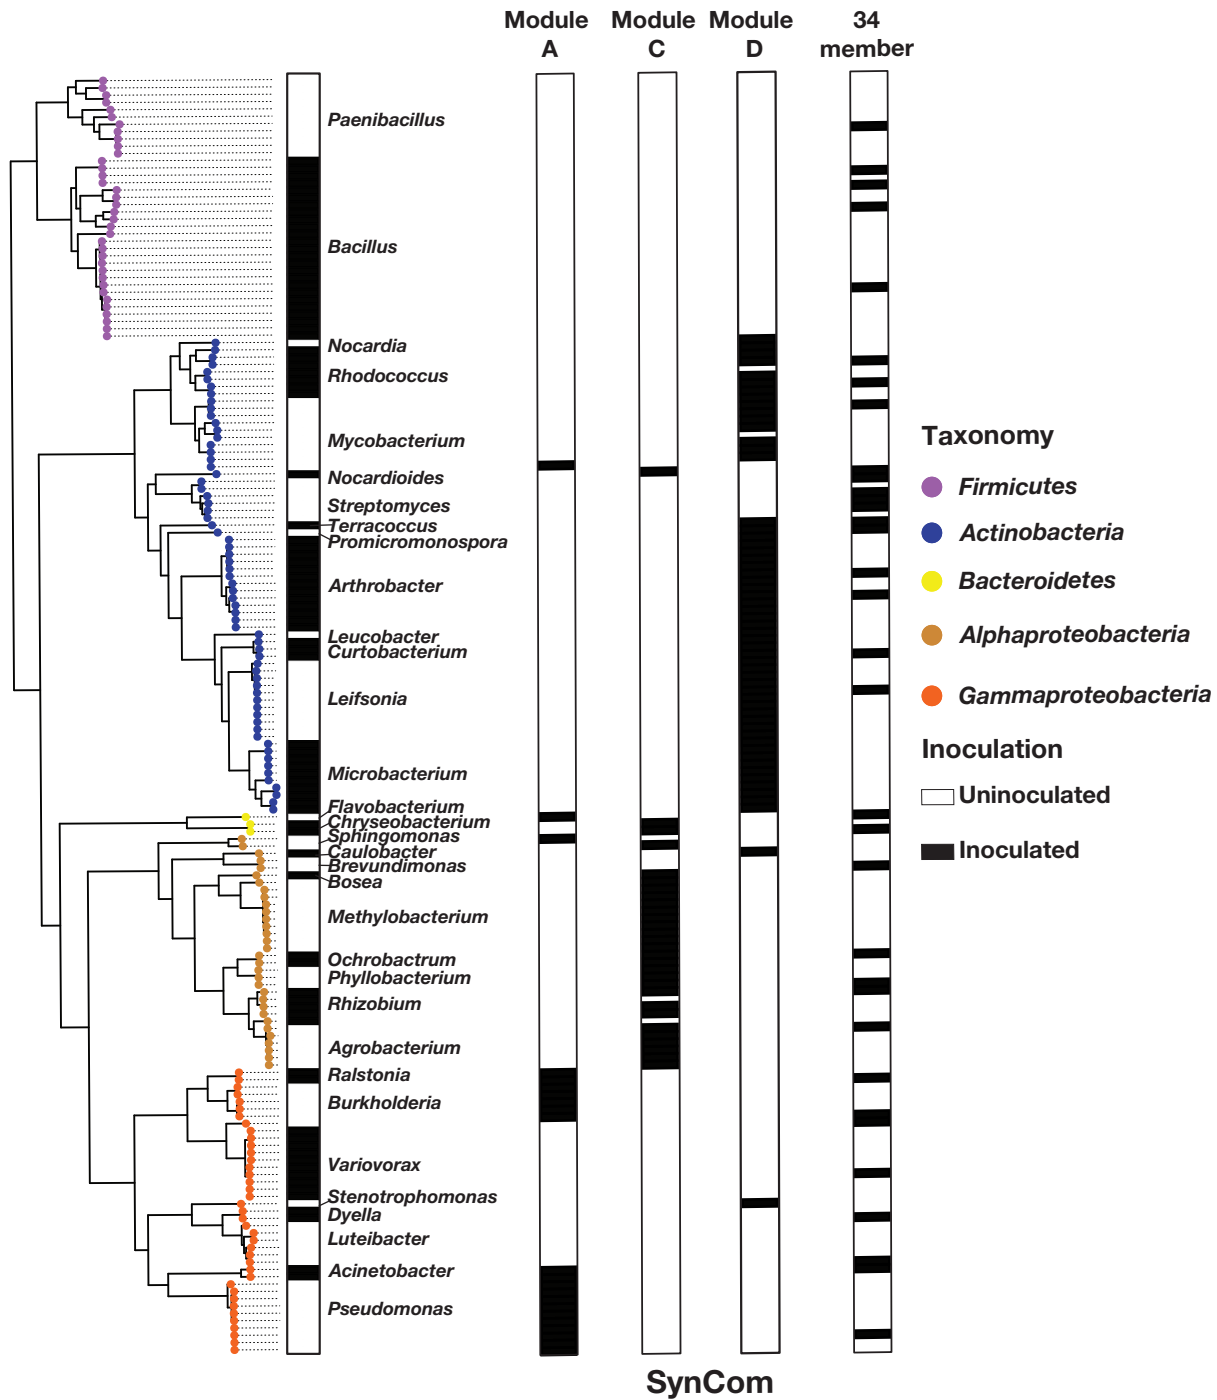

**Extended data Fig. 4**

**Taxonomic composition of the SynCom used in Figure 2D.**

Bar graphs showing the isolate composition of SynComs composed by module A (Module A), module C (Module C), module D (Module D) and a 34-member synthetic community (34 member)<sup>2</sup>. Isolates are ordered according to the phylogenetic tree on the left side of the panel. The tips of the phylogenetic tree are colored based on the genome-based taxonomy of each isolate. Presence of an isolate across the different SynComs is denoted by a black filled rectangle.

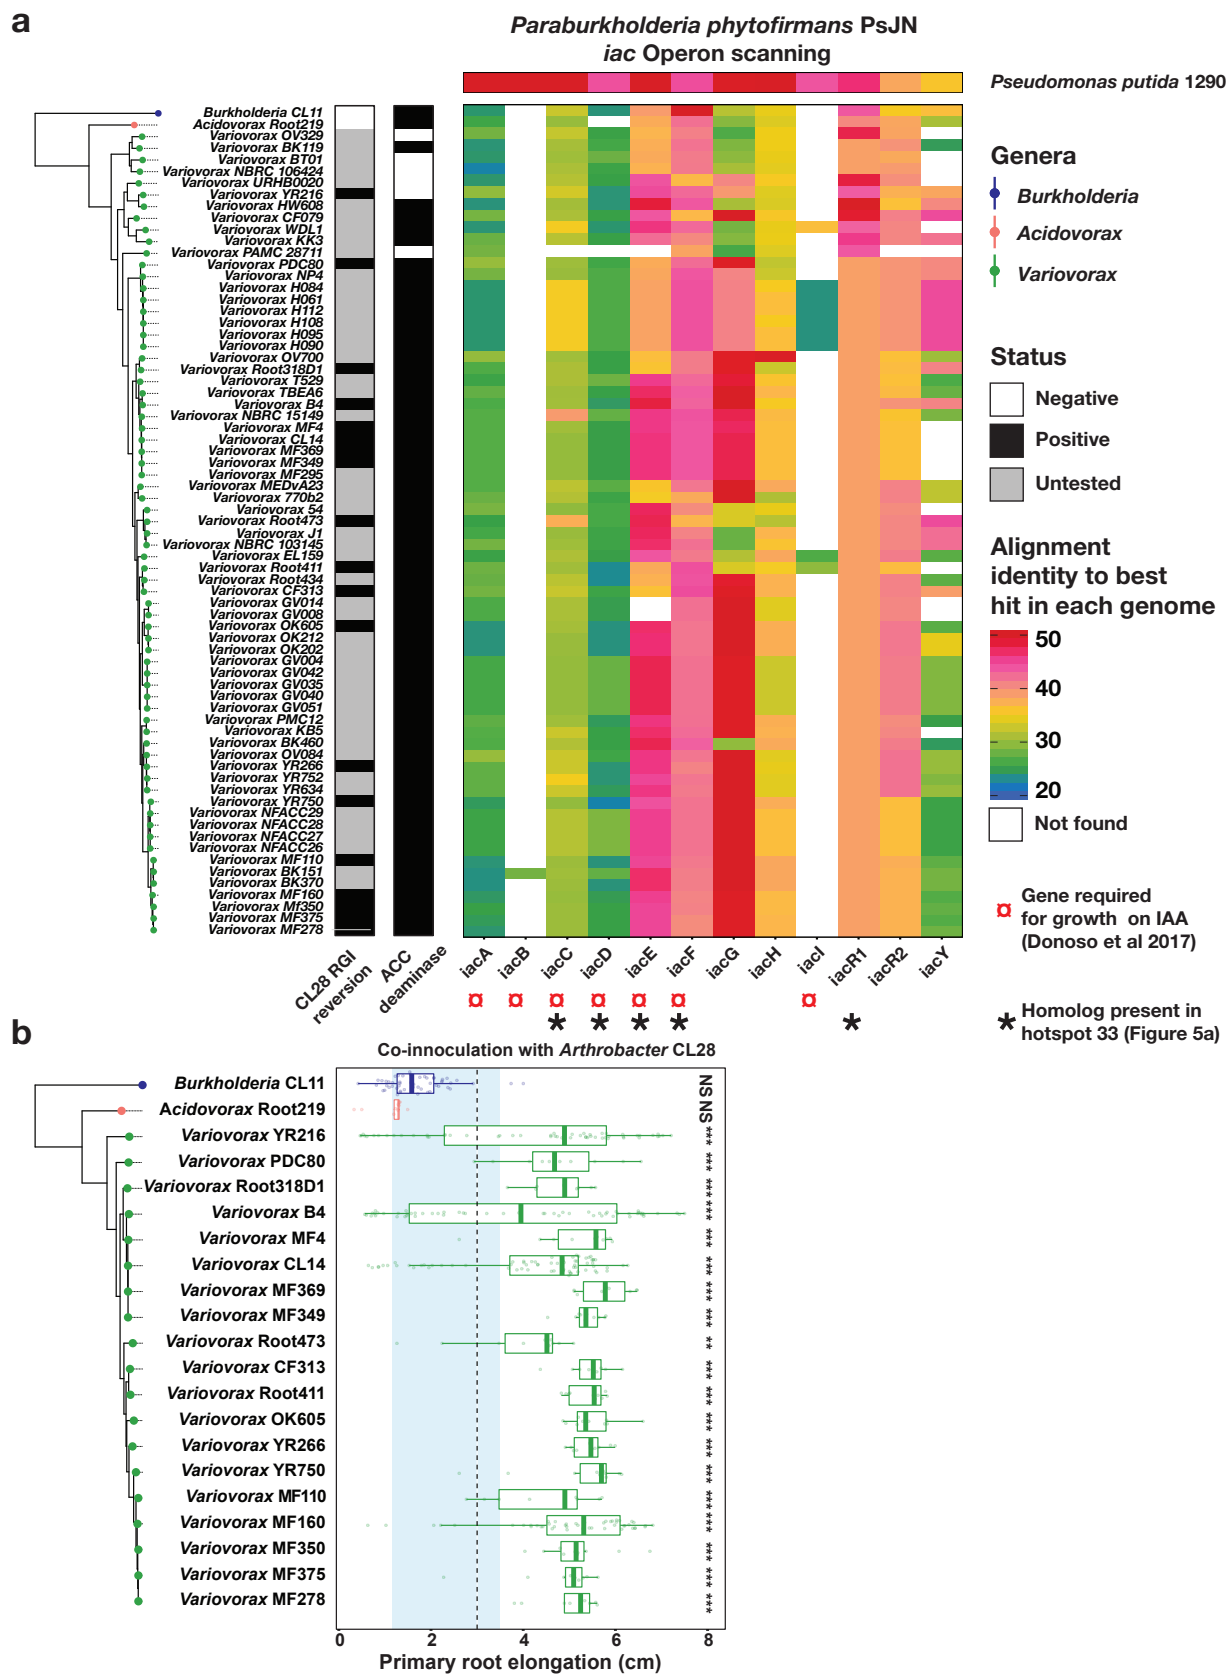

## Extended data Fig. 5

### Reversion of root growth inhibition is prevalent across the *Variovorax* phylogeny.

**(a)** Phylogenetic tree of 54 publically available *Variovorax* genomes and two outgroup isolates, *Acidovorax* Root219 and *Burkholderia* CL11. The CL28 RGI reversion bar binarizes (positive, negative, untested) the ability of each isolate in the phylogeny to revert the root growth inhibition caused by *Arthrobacter* CL28. The ACC deaminase bar denotes the presence of the KEGG orthology term KO1505 (1-aminocyclopropane-1-carboxylate deaminase) in each of the genomes. The heatmap denotes the percent identity of BLASTp hits in the genomes to the genes from the auxin degrading iac operon in *Paraburkholderia phytophirmans* described by Donoso, et al.<sup>33</sup>. Note that synteny is not conserved and these BLAST hits are spread throughout the genomes. **(b)** Phylogenetic tree of 19 *Variovorax* genomes along two outgroup isolates, *Acidovorax* Root219 and *Burkholderia* CL11 that were tested for their ability to revert the root growth inhibition (RGI) imposed by *Arthrobacter* CL28. The blue vertical strip across the panel denotes the interquartile range of plants treated solely with *Arthrobacter* CL28. The dotted vertical line across the panel denotes the 3 cm cutoff used to classify a treatment as a root growth inhibitor (RGI). Each boxplot is colored according to the genus classification of each isolate. Statistical significance is denoted on the top of each boxplot.

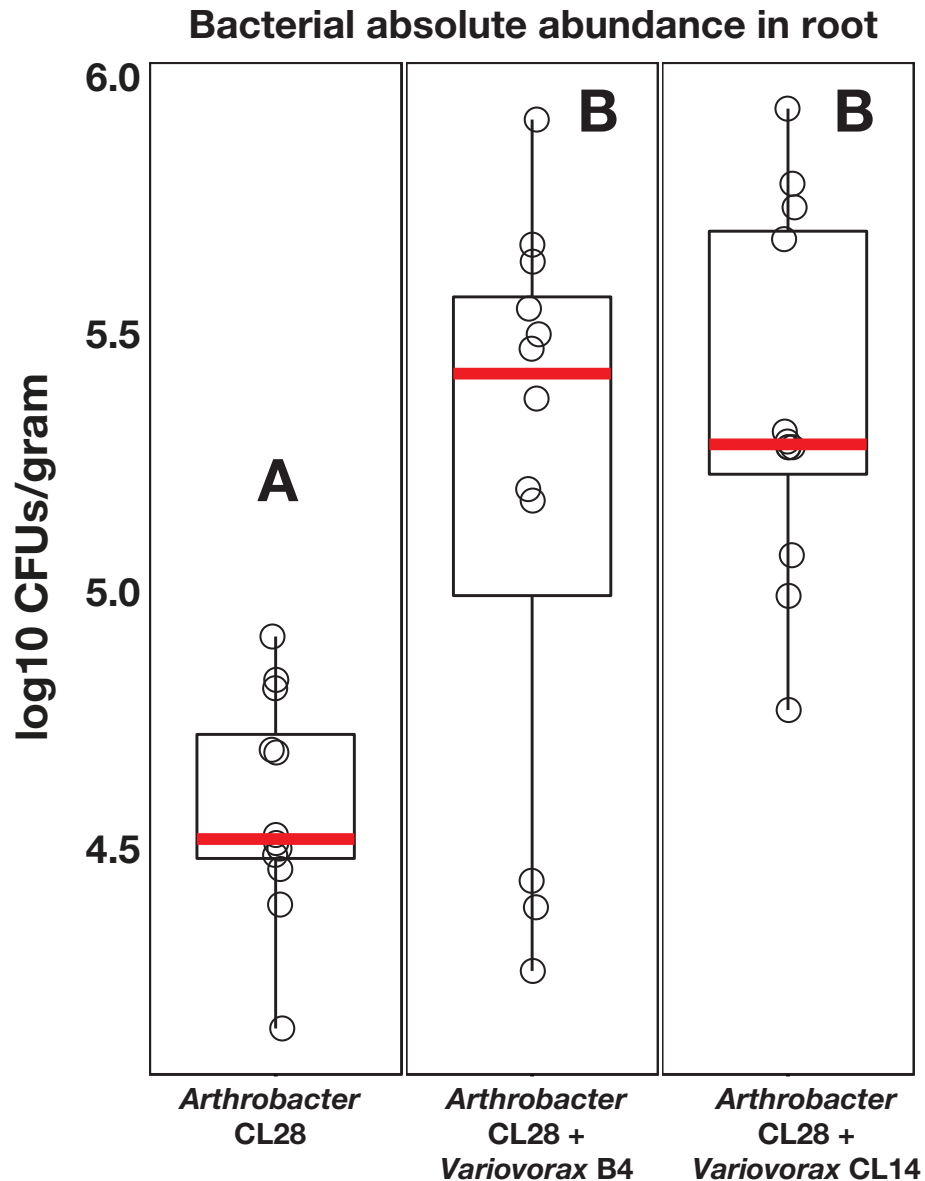

**Extended data Fig. 6**

**Variovorax does not inhibit the growth of an RGI strain.** In planta absolute abundance of *Arthrobacter* CL28 when inoculated alone or with two *Variovorax* representatives: *Variovorax* B4 and *Variovorax* CL14. Log-transformed-Colony forming Units (CFU) of *Arthrobacter* CL28 normalized to root weight are shown. To selectively grow *Arthrobacter* CL28, CFUs were counted on Luria Bertani (LB) agar plates containing 50 µg/ml of Apramycin, on which both *Variovorax* B4 and *Variovorax* CL14 do not grow.

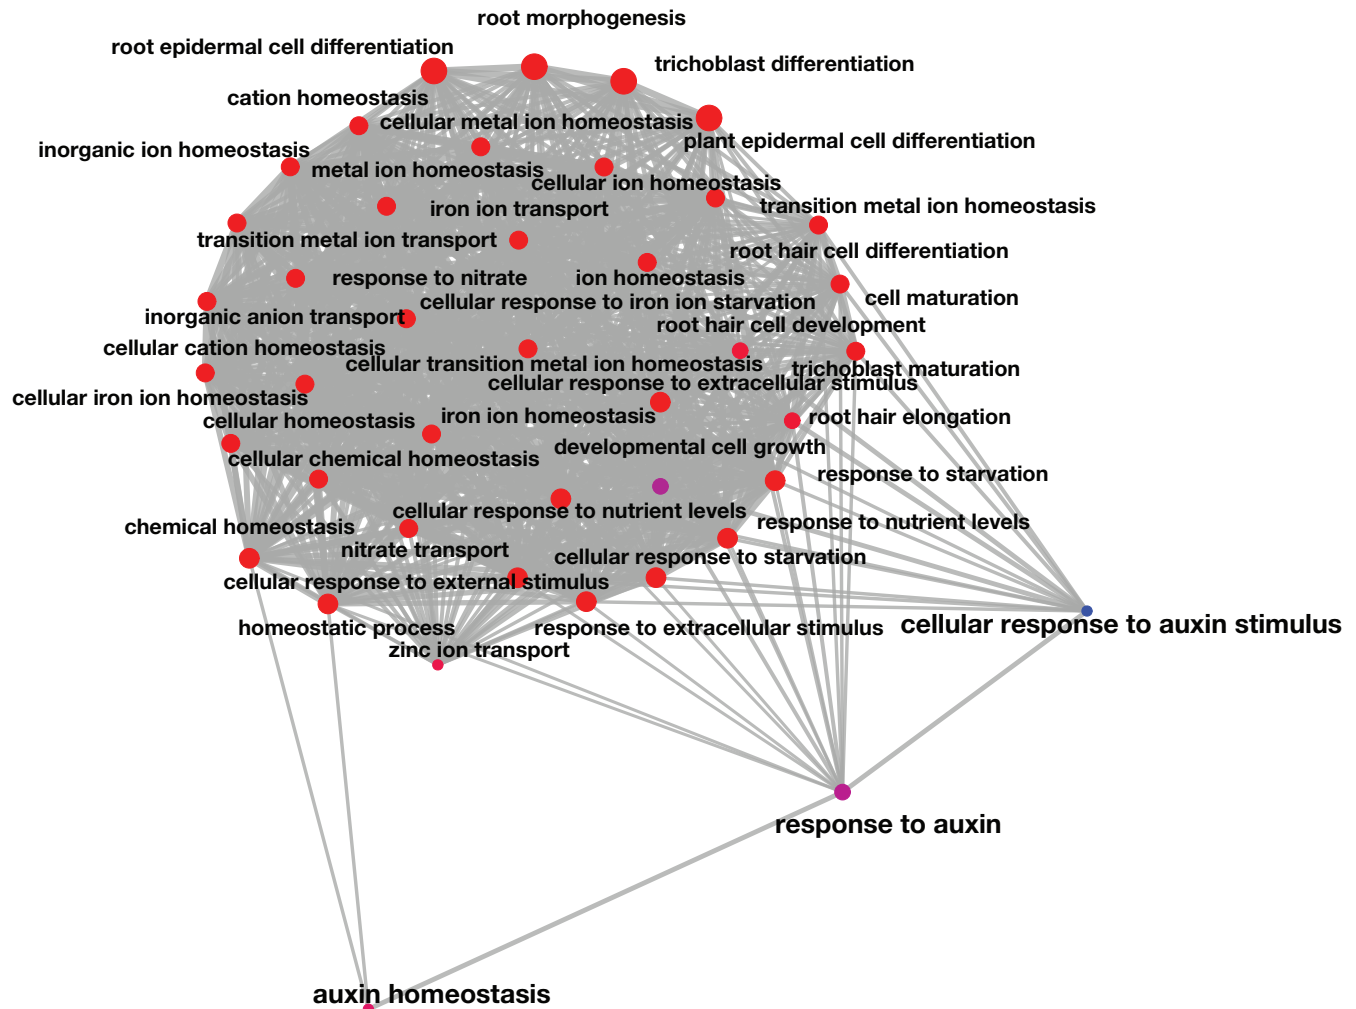

### Extended data Fig. 7

#### Root growth inhibition-related genes share gene ontologies.

Network of statistically significant gene ontology terms contained in the 18 genes upregulated in *Variovorax* CL14/*Arthrobacter* CL28 co-inoculation vs *Arthrobacter* CL28 alone AND in the full SynCom vs the *Variovorax* drop-out SynCom (See Figure 4a and 4b). The network was computed using the `emapplot` function from the package `clusterProfiler` in R. A p-value for terms across the gene ontology was computed using a hypergeometric test, additionally the size of each point (Gene ontology term) denoted the number of genes mapped in that particular term.

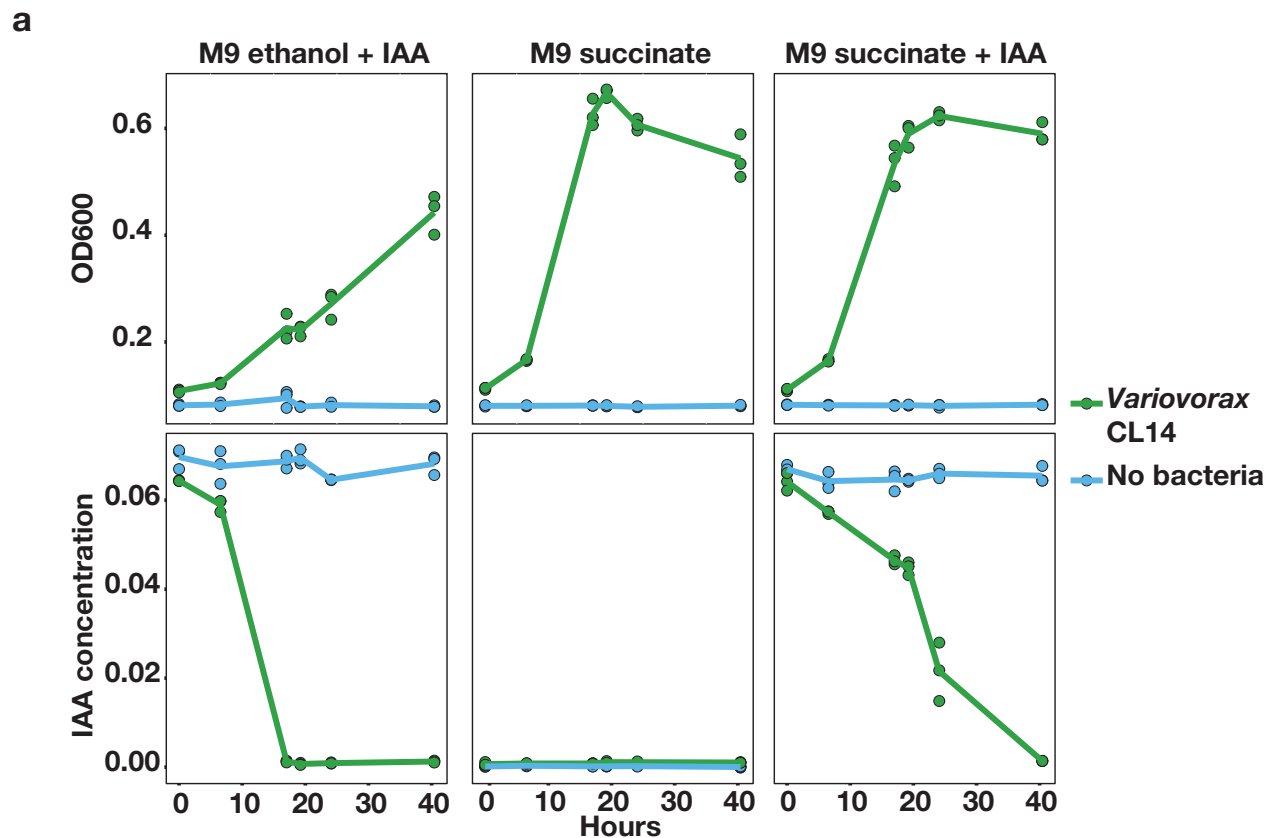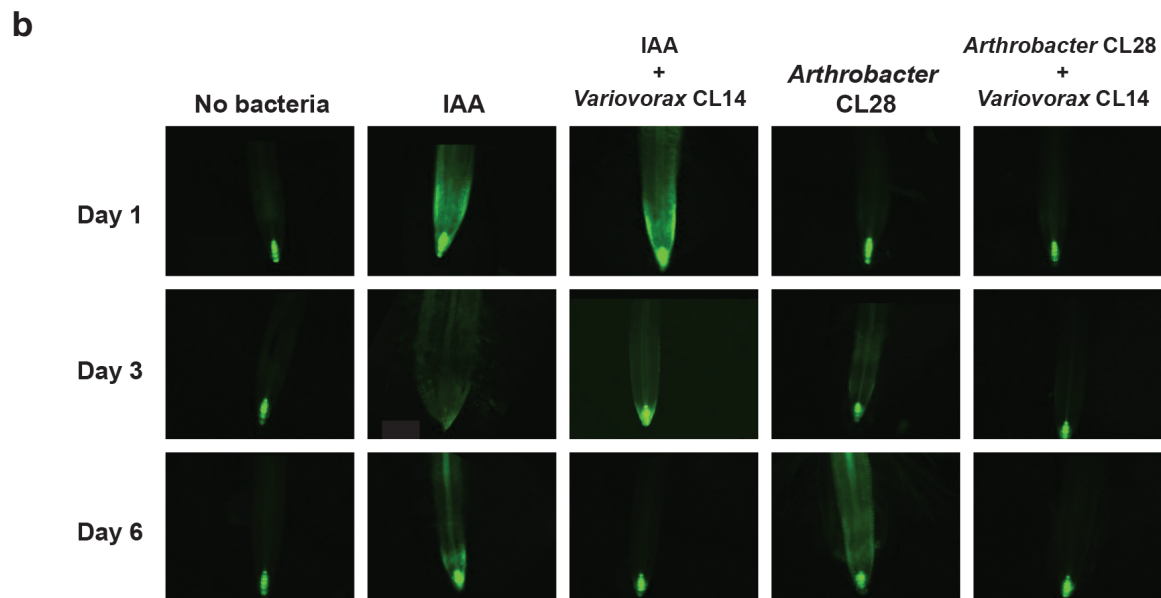

### **Extended data Fig. 8**

#### **Variovorax degrades auxin and quenches auxin perception by the plant.**

**(a)** Variovorax utilizes auxin as a carbon source. Growth curves showing Optical density at OD600 (top) and Indole-3-acetic acid (IAA) concentrations (mg/mL bottom) in Variovorax CL14 cultures grown in M9 media with carbon sources: IAA and ethanol (from IAA solubilization) (left), succinate (center), and succinate, IAA, and ethanol (right). **(b)** Variovorax quenches auxin bioreporter DR5::GFP induction. Main root tips of DR5::GFP plants grown with different Indole-3-acetic acid (IAA) and bacterial treatments. DR5::GFP plants were treated with the tripartite system (Arthrobacter CL28, Variovorax CL14, CL28+CL14), with the drop-out System (full Syncom, Variovorax drop-out Syncom [-Variovorax]), IAA and IAA+Variovorax CL14. GFP fluorescence was imaged 1, 3 and 6 days post inoculation. Fluorescence was quantified in the root elongation zone.

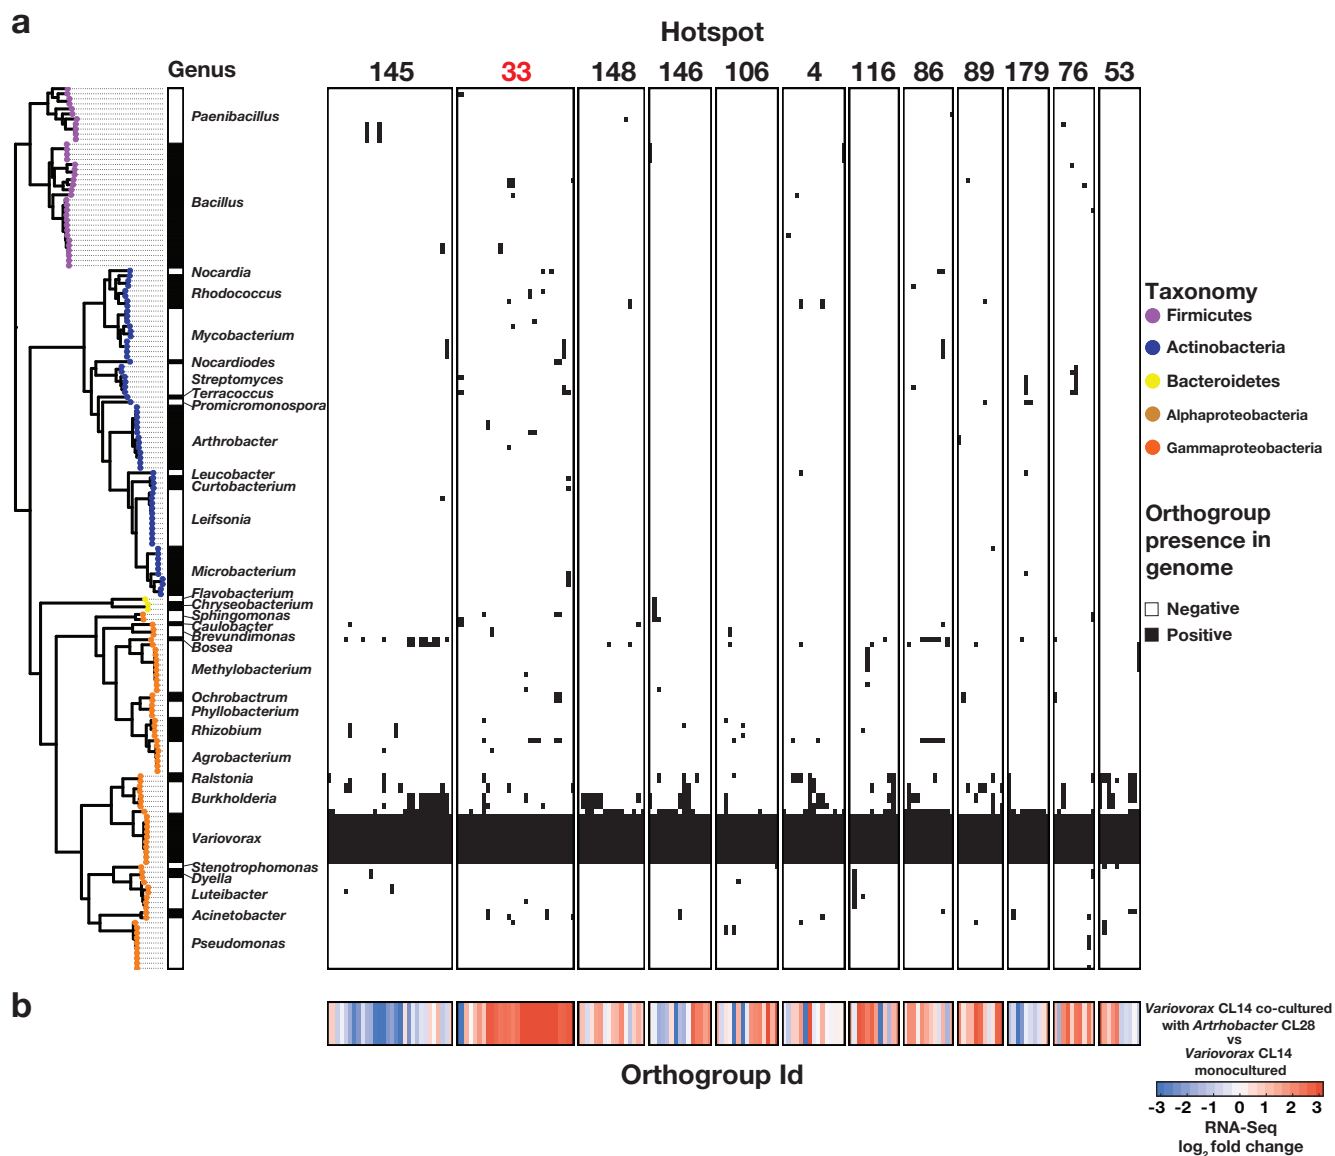

### Extended Data Fig. 9.

#### Detection of CL28-responsive *Variovorax*-unique operons.

**(a)** Presence/absence matrix denoting the distribution of 12 *Variovorax*-unique hotspots containing at least 10 genes across the 185 members of the SynCom. Hotspots are defined using the *Variovorax* CL14 genome as a reference. Phylogeny of the 185 SynCom members is shown to the left of the matrix. We determined the presence of an orthogroup based on a hidden Markov model profile scanning of each orthogroup across the 185 genomes in the SynCom. **(b)** Results of bacterial RNA-Seq. Log<sub>2</sub>(fold change) of each gene shown in the matrix in *Variovorax* CL14 is co-cultured with *Arthrobacter* CL28 versus *Variovorax* CL14 monoculture. Note uniform up-regulation of genes in cluster 33.



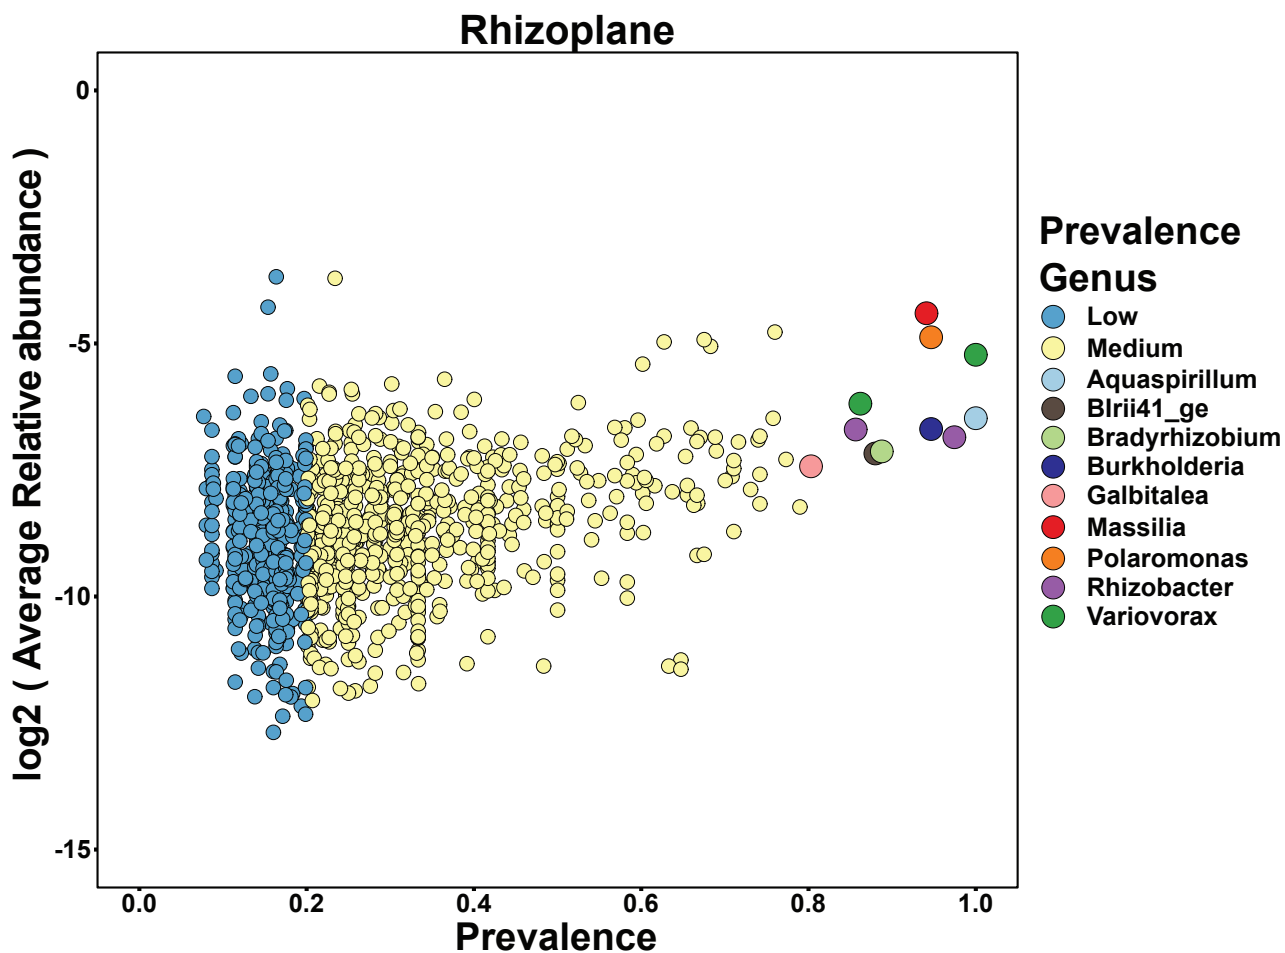

#### Extended data Fig. 10

**Variovorax are highly prevalent across naturally occurring Arabidopsis microbiomes.**

Correlation plot of data reanalyzed from Thiegart et al<sup>38</sup> comparing bacterial amplicon sequence variants (ASV) prevalence to log transformed relative abundance in *Arabidopsis thaliana* rhizosphere samples taken across 3 years in 17 sites in Europe.

## 294 **Methods**

295 1. *Arabidopsis* with bacterial SynCom microcosm across four stress gradients (Fig. 1,  
296 fig. S2-S3, data S2)

297 a. Bacterial culture and plant-inoculation

298 The 185-member bacterial synthetic community (SynCom) used here contains genome-  
299 sequenced isolates obtained from surface sterilized Brassicaceae roots, nearly all  
300 *Arabidopsis thaliana*, planted in two North Carolina, US, soils. A detailed description of  
301 this collection and isolation procedures can be found in<sup>24</sup>. One week prior to each  
302 experiment, bacteria were inoculated from glycerol stocks into 600  $\mu$ L KB medium in a  
303 96 deep well plate. Bacterial cultures were grown at 28 °C, shaking at 250 rpm. After five  
304 days of growth, cultures were inoculated into fresh media and returned to the incubator  
305 for an additional 48 hours, resulting in two copies of each culture, 7 days old and 48  
306 hours old. We adopted this procedure to account for variable growth rates of different  
307 SynCom members and to ensure that non-stationary cells from each strain were  
308 included in the inoculum. After growth, 48-hour and 7-day plates were combined and  
309 optical density of cultures was measured at 600 nm ( $OD_{600}$ ) using an Infinite M200 Pro  
310 plate reader (TECAN). All cultures were then pooled while normalizing the volume of each  
311 culture to  $OD_{600}=1$ . The mixed culture was washed twice with 10 mM  $MgCl_2$  to remove  
312 spent media and cell debris and vortexed vigorously with sterile glass beads to break up  
313 aggregates.  $OD_{600}$  of the mixed, washed culture was then measured and normalized to  
314  $OD_{600}=0.2$ . The SynCom inoculum (100  $\mu$ L ) was spread on 12 X 12 cm vertical square  
315 agar plates with amended Johnson medium (JM)<sup>2</sup> without sucrose prior to transferring  
316 seedlings.

317

318 b. In vitro plant growth conditions

319 All seeds were surface-sterilized with 70% bleach, 0.2% Tween-20 for 8 min, and rinsed  
320 three times with sterile distilled water to eliminate any seed-borne microbes on the seed  
321 surface. Seeds were stratified at 4 °C in the dark for two days. Plants were germinated  
322 on vertical square 12 X 12 cm agar plates with JM containing 0.5% sucrose, for 7 days.  
323 Then, 10 plants were transferred to each of the SynCom-inoculated agar plates. The  
324 composition of JM in the agar plates was amended to produce environmental variation.  
325 We added to the previously reported phosphate concentration gradient (0, 10, 30, 50,  
326 100, 1000  $\mu\text{M Pi}$ )<sup>39</sup> three additional environmental gradients: Salinity (50, 100, 150, 200  
327 mM NaCl), pH (5.5, 7.0, 8.2), and incubation temperature (10, 21, 31°C). Each gradient  
328 was tested separately, in two independent replicas. Each condition included three  
329 SynCom+plant samples, two no plant controls and one no bacteria control. Plates were  
330 placed in randomized order in growth chambers and grown under a 16-h dark/8-h light  
331 regime at 21 °C day/18 °C night for 12 days. Upon harvest, DNA was extracted from  
332 roots, shoots and agar.

333

334 c. DNA extraction

335 Roots, shoots and agar were harvested separately, pooling 6-8 plants for each sample.  
336 Roots and shoots were placed in 2 mL Eppendorf tubes with three sterile glass beads.  
337 These samples were washed three times with sterile distilled water to remove agar  
338 particles and weakly associated microbes. Tubes containing the samples were stored at  
339 -80 °C until processing. Root and shoot samples were lyophilized for 48 hours using a

340 Labconco freeze dry system and pulverized using a tissue homogenizer (MPBio). Agar  
341 from each plate was collected in 30 mL syringes with a square of sterilized Miracloth  
342 (Millipore) at the bottom and kept at -20 °C for one week. Syringes were then thawed at  
343 room temperature and samples were squeezed gently through the Miracloth into 50 mL  
344 falcon tubes. Samples were centrifuged at max speed for 20 min and most of the  
345 supernatant was discarded. The remaining 1-2 mL of supernatant, containing the pellet,  
346 was transferred into clean 1.5 mL Eppendorf tubes. Samples were centrifuged again,  
347 supernatant was removed, and pellets were stored at -80 °C until DNA extraction. DNA  
348 extractions were carried out on ground root and shoot tissue and agar pellets using 96-  
349 well-format MoBio PowerSoil Kit (MOBIO Laboratories; Qiagen) following the  
350 manufacturer's instruction. Sample position in the DNA extraction plates was  
351 randomized, and this randomized distribution was maintained throughout library  
352 preparation and sequencing.

353

#### 354 d. Bacterial 16S sequencing

355 We amplified the V3-V4 regions of the bacterial 16S rRNA gene using the primers 338F  
356 (5'-ACTCCTACGGGAGGCAGCA-3') and 806R (5'-GGACTACHVGGGTWTCTAAT-3').  
357 Two barcodes and six frameshifts were added to the 5' end of 338F and six frameshifts  
358 were added to the 806R primers, based on the protocol by Lundberg et al<sup>40</sup>. Each PCR  
359 reaction was performed in triplicate, and included a unique mixture of three frameshifted  
360 primer combinations for each plate. PCR conditions were as follows: 5 µL Kapa  
361 Enhancer, 5 µL Kapa Buffer A, 1.25 µL 5 µM 338F, 1.25 µL 5 µM 806R, 0.375 µL mixed  
362 plant rRNA gene-blocking peptide nucleic acids (PNAs; 1:1 mix of 100 µM plastid PNA

363 and 100  $\mu$ M mitochondrial PNA<sup>40</sup>), 0.5  $\mu$ L Kapa dNTPs, 0.2  $\mu$ L Kapa Robust Taq, 8  $\mu$ L  
364 dH<sub>2</sub>O, 5  $\mu$ L DNA; temperature cycling: 95°C for 60 s; 24 cycles of 95°C for 15 s; 78°C  
365 (PNA) for 10 s; 50°C for 30 s; 72°C for 30 s; 4°C until use. Following PCR cleanup, using  
366 AMPure beads (Beckman Coulter), the PCR product was indexed using 96 indexed 806R  
367 primers with the Kapa HiFi Hotstart readymix with the same primers as above;  
368 temperature cycling: 95°C for 60 s; 9 cycles of 95°C for 15 s; 78°C (PNA) for 10 s; 60°C  
369 for 30 s; 72°C for 35 s; 4°C until use. PCR products were purified using AMPure XP  
370 magnetic beads (Beckman Coulter) and quantified with a Qubit 2.0 fluorometer  
371 (Invitrogen). Amplicons were pooled in equal amounts and then diluted to 10 pM for  
372 sequencing. Sequencing was performed on an Illumina MiSeq instrument using a 600-  
373 cycle V3 chemistry kit. DNA sequence data for this experiment is available at the NCBI  
374 bioproject repository (accession PRJNA543313). The abundance matrix, metadata and  
375 taxonomy are available at <https://github.com/isaisg/variovoraxRGI>.

376

377 e. 16S amplicon sequence data processing

378 SynCom sequencing data were processed with MT-Toolbox<sup>41</sup>. Usable read output from  
379 MT-Toolbox (that is, reads with 100% correct primer and primer sequences that  
380 successfully merged with their pair) were quality filtered using Sickle<sup>42</sup> by not allowing  
381 any window with Q-score under 20. The resulting sequences were globally aligned to a  
382 reference set of 16S rDNA sequences extracted from genome assemblies of SynCom  
383 members. For strains that did not have an intact 16S rDNA sequence in their assembly,  
384 we sequenced the 16S rRNA gene using Sanger sequencing. The reference database  
385 also included sequences from known bacterial contaminants and Arabidopsis organellar

386 sequences. Sequence alignment was performed with USEARCH v7.1090<sup>43</sup> with the  
387 option 'usearch\_global' at a 98% identity threshold. On average, 85% of sequences  
388 matched an expected isolate. Our 185 isolates could not all be distinguished from each  
389 other based on the V3-V4 sequence and were thus classified into 97 unique sequences  
390 (USeqs). A USeq encompasses a set of identical (clustered at 100%) V3-V4 sequences  
391 coming from a single or multiple isolates.

392

393 Sequence mapping results were used to produce an isolate abundance table. The  
394 remaining unmapped sequences were clustered into Operational Taxonomic Units  
395 (OTUs) using UPARSE<sup>44</sup> implemented with USEARCH v7.1090, at 97% identity.  
396 Representative OTU sequences were taxonomically annotated with the RDP classifier<sup>45</sup>  
397 trained on the Greengenes database<sup>46</sup> (4 February 2011). Matches to Arabidopsis  
398 organelles were discarded. The vast majority of the remaining unassigned OTUs  
399 belonged to the same families as isolates in the SynCom. We combined the assigned  
400 USeq and unassigned OTU count tables into a single count table. In addition to the raw  
401 count table, we created rarefied (1000 reads per sample) and relative abundance  
402 versions of the abundance matrix for further analyses.

403

404 The resulting abundance tables were processed and analyzed with functions from the  
405 ohchibi package (<https://github.com/isaisg/ohchibi>). An alpha diversity metric (Shannon  
406 diversity) was calculated using the diversity function from the vegan package v2.5-3<sup>47</sup>.  
407 We used ANOVA to test for differences in alpha diversity between groups. Beta diversity  
408 analyses (Principal coordinate analysis, and canonical analysis of principal coordinates)

409 were based on Bray-Curtis dissimilarity calculated from the relative abundance matrices.  
410 We used the capscale function from the vegan R package v.2.5-3<sup>47</sup> to compute the  
411 canonical analysis of principal coordinates (CAP). To analyze the full dataset (all fraction,  
412 all abiotic treatments), we constrained by fraction and abiotic treatment while  
413 conditioning for the replica and experiment effect. We explored the abiotic conditions  
414 effect inside each of the four abiotic gradients tested (phosphate, salinity, pH and  
415 temperature). We performed the Fraction:abiotic interaction analysis within each fraction  
416 independently, constraining for the abiotic conditions while conditioning for the replica  
417 effect. In addition to CAP, we performed Permutational Multivariate Analysis of Variance  
418 (PERMANOVA) using the adonis function from the vegan package v2.5-3<sup>47</sup>. We used the  
419 package DESeq2 v1.22.1<sup>48</sup> to compute the enrichment profiles for USeqs present in the  
420 count table.

421  
422 We estimated the fraction effect across all the abiotic conditions tested by creating a  
423 group variable that merged the fraction variable and the abiotic condition variable  
424 together (e.g Root\_0Pi, Agar\_0Pi). We fitted the following model specification using this  
425 group variable:

426  $Abundance \sim Rep + Experiment + group$

427 From the fitted model, we extracted, for all levels within the group variables, the following  
428 comparisons: Agar vs Root and Agar vs Shoot. A USeq was considered statistically  
429 significant if it had a false discovery rate (FDR) adjusted  $p$ -value  $< 0.05$ .

430  
431 All scripts and dataset objects necessary to reproduce the synthetic community

432 analyses are deposited in the following github repository:

433 <https://github.com/isaisg/variovoraxRGI>

434

435 f. Co-occurrence analysis

436 The relative abundance matrix (USeqs X Samples) was standardized across the USeqs

437 by dividing the abundance of each USeq in its sample over the mean abundance of that

438 USeq across all samples. Subsequently, we created a dissimilarity matrix based on the

439 Pearson correlation coefficient between all the pairs of strains in the transformed

440 abundance matrix, using the `cor` function in the stats base package in R. Finally,

441 hierarchichal clustering (method `ward.D2`, function `hclust`) was applied over the

442 dissimilarity matrix constructed above.

443

444 g. Heatmap and family enrichment analysis

445 We visualized the results of the GLM model testing the fraction effects across each

446 specific abiotic condition tested using a heatmap. The rows in the heatmap were ordered

447 according to the dendrogram order obtained from the USeqs co-occurrence analysis.

448 The heatmap was colored based on the  $\log_2$ FoldChange output by the GLM model. We

449 highlighted in a black shade the comparisons that were significant ( $q$ -value < 0.05).

450 Finally, for each of the four modules we computed for each family present in that module

451 a hypergeometric test testing if that family was overrepresented (enriched) in that

452 particular module. Families whose FDR  $p$ -value < 0.1 were visualized in the figure.

453

454 2. Deconstructing the SynCom to four modules of co-occurring strains (Fig. 2a, 2c and



455 data S3).

456 a. Bacterial culture and plant-inoculation

457 Strains belonging to each module: A, B, C and D (Materials and Methods 1f) were grown  
458 in separate deep 96-well plates and mixed as described above (Materials and Methods  
459 1a). The concentration of each module was adjusted to  $OD_{600}=0.05$  (1/4 of the  
460 concentration of the full SynCom). Each module was spread on the plates either  
461 separately, or in combination with another module at a total volume of 100  $\mu$ L. In  
462 addition, we included a full SynCom control and an uninoculated control, bringing the  
463 number of SynCom combinations to 12. We performed the experiment in two  
464 independent replicates and each replicate included five plates per SynCom combination.

465

466 b. *In vitro* plant growth conditions

467 Seed sterilization and germination conditions were the same as Materials and Methods  
468 1b. Plants were transferred to each of the SynCom-inoculated agar plates containing JM  
469 without sucrose. Plates were placed in randomized order in growth chambers and grown  
470 under a 16-h dark/8-h light regime at 21 °C day/18 °C night for 12 days. Upon harvest,  
471 root morphology was measured.

472

473 c. Root and shoot image analysis

474 Plates were imaged twelve days post-transferring, using a document scanner. Primary  
475 root length elongation was measured using ImageJ<sup>49</sup> and shoot area and total root  
476 network were measured with WinRhizo software (Regent Instruments Inc.).

477

478 d. Primary root elongation analyses

479 Primary root elongation was compared across the No Bacteria, full SynCom, single  
480 modules and pairs of modules treatments jointly using an ANOVA model controlling for  
481 the replicate effect. Differences between treatments were indicated using the confidence  
482 letter display (CLD) derived from the Tukey's post hoc test implemented in the package  
483 emmeans<sup>50</sup>.

484

485 3. Inoculating plants with all SynCom isolates separately (Fig. 2B, fig. S4 and data S4)

486 a. Bacterial culture and plant-inoculation.

487 Cultures from each strain in the SynCom were grown in KB medium and washed  
488 separately (Methods 1a), and OD<sub>600</sub> was adjusted to 0.01 before spreading 100 µL on  
489 plates. We performed the experiment in two independent replicates and each replicate  
490 included one plate per each of the 185 strains. *In vitro* growth conditions were the same  
491 as in Materials and Methods 2b. Upon harvest, root morphology was measured  
492 (Materials and Methods 2c). Isolates generating an average main root elongation of <3  
493 cm were classified as RGI-inducing strains.

494

495 4. Tripartite plant-microbe-microbe experiments (Fig. 2D-F and data S5-S6)

496 a. Experimental design

497 To identify strains that revert RGI (Fig. 2D and data S5), we selected all 18 non-RGI  
498 inducing strains in module A and co-inoculated them with each of four RGI inducing  
499 strains, one from each module. The experiment also included uninoculated controls and  
500 controls consisting of each of the 22 strains inoculated alone, amounting to 95 separate

501 bacterial combinations.

502

503 To confirm the ability of *Variovorax* and *Burkholderia* to attenuate RGI induced by diverse  
504 bacteria (Fig. 2E and data S6), three RGI attenuating strains were co-inoculated with a  
505 selection of 18 RGI inducing strains. The experiment also included uninoculated controls  
506 and controls consisting of each of the 21 strains inoculated alone. Thus, the experiment  
507 consisted of 76 separate bacterial combinations. We performed each of these two  
508 experiments in two independent replicates and each replicate included one plate per  
509 each of the strain combinations.

510

511 b. Bacterial culture and plant-inoculation

512 All strains were streaked on agar plates, then transferred to 4 ml liquid KB medium for  
513 over-night growth. Cultures were then washed, and OD<sub>600</sub> was adjusted to 0.02 before  
514 mixing and spreading 100 µL on each plate. Upon harvest, root morphology was  
515 measured (Materials and Methods 2c) and plant RNA was harvested and processed from  
516 uninoculated samples, and from samples with *Variovorax* CL14, *Arthrobacter* CL28 and  
517 the combination of both (Materials and Methods 4d).

518

519 c. Primary root elongation analysis.

520 We fitted ANOVA models for each RGI-inducing strain tested. Each model compared the  
521 primary root elongation with the RGI inducing strains alone against root elongation when  
522 the RGI inducing strain was co-inoculated with other isolates. The *p*-values for all the  
523 comparisons were corrected for multiple testing using false discovery rate (FDR).

524

525 d. RNA extraction

526 RNA was extracted from *A. thaliana* seedlings following Logemann et al<sup>51</sup>. Four seedlings  
527 were harvested from each sample and samples were flash frozen and stored at -80 °C  
528 until processing. Frozen seedlings were ground using a TissueLyzer II (Qiagen), then  
529 homogenized in a buffer containing 400 µL of Z6-buffer; 8 M guanidine HCl, 20 mM MES,  
530 20 mM EDTA at pH 7.0. 400 µL phenol:chloroform:isoamylalcohol, 25:24:1 was added,  
531 and samples were vortexed and centrifuged (20,000 g, 10 minutes) for phase separation.  
532 The aqueous phase was transferred to a new 1.5 mL Eppendorf tube and 0.05 volumes  
533 of 1 N acetic acid and 0.7 volumes 96% ethanol were added. The RNA was precipitated  
534 at -20 °C overnight. Following centrifugation (20,000 g, 10 minutes, 4°C), the pellet was  
535 washed with 200 µL sodium acetate (pH 5.2) and 70% ethanol. The RNA was dried and  
536 dissolved in 30 µL of ultrapure water and stored at -80 °C until use.

537

538 e. Plant RNA sequencing

539 Illumina-based mRNA-Seq libraries were prepared from 1 µg RNA following<sup>4</sup>. mRNA was  
540 purified from total RNA using Sera-mag oligo(dT) magnetic beads (GE Healthcare Life  
541 Sciences) and then fragmented in the presence of divalent cations (Mg<sup>2+</sup>) at 94°C for 6  
542 minutes. The resulting fragmented mRNA was used for first-strand cDNA synthesis using  
543 random hexamers and reverse transcriptase, followed by second-strand cDNA synthesis  
544 using DNA Polymerase I and RNaseH. Double-stranded cDNA was end-repaired using  
545 T4 DNA polymerase, T4 polynucleotide kinase, and Klenow polymerase. The DNA  
546 fragments were then adenylated using Klenow exo-polymerase to allow the ligation of

547 Illumina Truseq HT adapters (D501–D508 and D701–D712). All enzymes were purchased  
548 from Enzymatics. Following library preparation, quality control and quantification were  
549 performed using a 2100 Bioanalyzer instrument (Agilent) and the Quant-iT PicoGreen  
550 dsDNA Reagent (Invitrogen), respectively. Libraries were sequenced using Illumina  
551 HiSeq4000 sequencers to generate 50-bp single-end reads.

552

#### 553 f. RNA-Seq read processing

554 Initial quality assessment of the Illumina RNA-Seq reads was performed using FastQC  
555 v0.11.7<sup>52</sup>. Trimmomatic v0.36<sup>53</sup> was used to identify and discard reads containing the  
556 Illumina adaptor sequence. The resulting high-quality reads were then mapped against  
557 the TAIR10 Arabidopsis reference genome using HISAT2 v2.1.0<sup>54</sup> with default  
558 parameters. The featureCounts function from the Subread package<sup>55</sup> was then used to  
559 count reads that mapped to each one of the 27,206 nuclear protein-coding genes.  
560 Evaluation of the results of each step of the analysis was performed using MultiQC v1.1<sup>56</sup>.  
561 Raw sequencing data and read counts are available at the NCBI Gene Expression  
562 Omnibus accession number GSE131158.

563

### 564 5. *Variovorax* drop-out experiment (Fig. 3A-C and data S7)

#### 565 a. Bacterial culture and plant-inoculation.

566 The entire SynCom, excluding all 10 *Variovorax* isolates and all five *Burkholderia* isolates  
567 was grown and prepared as described above (Materials and Methods 1a). The *Variovorax*  
568 and *Burkholderia* isolates were grown in separate tubes, washed and added to the rest  
569 of the SynCom to a final OD<sub>600</sub> of 0.001 (the calculated OD<sub>600</sub> of each individual strain in

570 a 185-Member SynCom at a total of OD<sub>600</sub> of 0.2), to form the following five mixtures: (i)  
571 Full community: all *Variovorax* and *Burkholderia* isolates added to the SynCom; (ii)  
572 *Burkholderia* drop-out: only *Variovorax* isolates added to the SynCom; (iii) *Variovorax*  
573 drop-out: only *Burkholderia* isolates added to the SynCom; (iv) *Variovorax* and  
574 *Burkholderia* drop-out: no isolates added to the SynCom; (v) Uninoculated plants: no  
575 SynCom. The experiment consisted of six plates per SynCom mixture, amounting to 30  
576 plates. Upon harvest, root morphology was measured and analyzed (Materials and  
577 Methods 1c,4c); and Bacterial DNA (Materials and Methods 1d) and plant RNA (Materials  
578 and Methods 4d-e) were harvested and processed.

579

580 6. *Variovorax* drop-out under varying abiotic contexts (Fig. 3E and data S7)

581 a. Bacterial culture and plant-inoculation.

582 The composition of JM in the agar plates was amended to produce abiotic environmental  
583 variation. These amendments included salt stress (150 mM NaCl), low Phosphate (10 µM  
584 Phosphate), high pH (pH 8.2) and high temperature (plates incubated at 31 °C), as well  
585 as an un-amended JM control. Additionally, we tested a different media (1/2-strength  
586 Murashige and Skoog [MS]) and a soil-like substrate. As a soil-like substrate, we used  
587 calcined clay (Diamond Pro), prepared as follows: 100 mL of clay was placed in Magenta  
588 GA7 jars. The jars were then autoclaved twice. 40 mL of liquid JM was added to the  
589 Magenta jars, with the corresponding bacterial mixture spiked into the media at a final  
590 OD<sub>600</sub> of 5E-4. Four 1-week old seedlings were transferred to each vessel, and vessels  
591 were covered with Breath-Easy gas permeable sealing membrane (Research Products  
592 International) to maintain sterility and gas exchange.

593

594 The entire SynCom, excluding all 10 *Variovorax* isolates was grown and prepared as  
595 described above (Materials and Methods 1a). The *Variovorax* isolates were grown in  
596 separate tubes, washed and added to the rest of the SynCom to a final OD<sub>600</sub> of 0.001  
597 (the calculated OD<sub>600</sub> of each individual strain in a 185-Member SynCom at an OD<sub>600</sub> of  
598 0.2), to form the following five mixtures: (i) Full community: all *Variovorax* isolates added  
599 to the SynCom; (ii) *Variovorax* drop-out: no isolates added to the SynCom; (iii)  
600 Uninoculated plants: no SynCom.

601

602 We inoculated all three SynCom combinations in all seven abiotic treatments, amounting  
603 to 21 experimental conditions. We performed the experiment in two independent  
604 replicates and each replicate included three plates per experimental conditions,  
605 amounting to 63 plates per replicate. Upon harvest, root morphology was measured  
606 (Materials and Methods 2c); and Bacterial DNA (Materials and Methods 1c-e) and plant  
607 RNA (Materials and Methods 4d-f) were harvested and processed.

608

#### 609 b. Root image analysis

610 For agar plates, roots were imaged as described above (Materials and Methods 2c). For  
611 calcined clay pots, four weeks post-transferring, pots were inverted, and whole root  
612 systems were gently separated from the clay by washing with water. Root systems were  
613 spread over an empty petri dish and scanned using a document scanner.

614

#### 615 c. Primary root elongation and total root network analysis.

616 Primary root elongation was compared between SynCom treatments within each of the  
617 different abiotic contexts tested independently. Differences between treatments were  
618 indicated using the confidence letter display (CLD) derived from the Tukey's post hoc  
619 test implemented in the package emmeans.

620

#### 621 d. Bacterial 16S data analysis

622 To be able to compare shifts in the community composition of samples treated with and  
623 without the *Variovorax* genus, we *in silico* removed the 10 *Variovorax* isolates from the  
624 count table of samples inoculated with the Full community treatment. We then merged  
625 this count table with the count table constructed from samples inoculated without the  
626 *Variovorax* genus (*Variovorax* drop-out treatment). Then, we calculated a relative  
627 abundance of each USeq across all the samples using the merged count matrix. Finally,  
628 we applied Canonical Analysis of Principal Coordinates (CAP) over the merged relative  
629 abundance matrix to control for the replica effect. In addition, we utilized the function  
630 `adonis` from the `vegan` R package to compute a PERMANOVA test over the merged  
631 relative abundance matrix and we fitted a model evaluating the fraction and SynCom  
632 (presence of *Variovorax*) effects over the assembly of the community.

633

### 634 7. *Variovorax* drop-out under varying biotic contexts (Fig. 3D, fig S7 and data S7)

#### 635 a. Bacterial culture and plant-inoculation.

636 Strains belonging to modules A (excluding *Variovorax*), C and D were grown in separate  
637 wells in deep 96-well plates and mixed as described above (Materials and Methods 1a).  
638 The concentration of each module was adjusted to  $OD_{600}=0.05$  (1/4 of the concentration



639 of the full SynCom). The *Variovorax* isolates were grown in separate tubes, washed and  
640 added to the rest of the SynCom to a final OD<sub>600</sub> of 0.001.

641

642 In a separate experiment, the 35-member SynCom used by Castrillo et al<sup>2</sup> was grown,  
643 excluding *Variovorax* CL14, to create a taxonomically diverse, *Variovorax*-free subset of  
644 the full 185 community. The concentration of this SynCom was adjusted to OD<sub>600</sub>=0.05.

645 The *Variovorax* isolates were grown in separate tubes, washed and added to the rest of  
646 the SynCom to a final OD<sub>600</sub> of 0.001.

647

648 These two experiments included the following mixtures (fig S7 and data S7): (i) Module  
649 A excluding *Variovorax*; (ii) Module C; (iii) Module D; (iv) Module A including *Variovorax*;  
650 (v) Module C + all 10 *Variovorax*; (vi) Module D + all 10 *Variovorax*; (vii) 35-member  
651 SynCom excluding *Variovorax*; (viii) 34-member SynCom + all 10 *Variovorax*; (ix)  
652 uninoculated control. The experiment with modules A, C and D was performed in two  
653 independent experiments, with two plates per treatment in each. The experiment with  
654 the 34-member SynCom was performed once, with 5 plates per treatment. Upon  
655 harvest, root morphology was measured (Materials and Methods 2c).

656

657 b. Primary root elongation analysis.

658 We directly compared differences between the full SynCom and *Variovorax* drop-out  
659 treatment using a *t*-test and adjusting the *p*-values for multiple testing using false  
660 discovery rate.

661

662 8. Phylogenetic inference of the SynCom and *Variovorax* isolates (Fig 2A, fig. S1A, S4,  
663 S7 and S9A-B)

664 To build the phylogenetic tree of the SynCom isolates, we used the super matrix  
665 approach previously described in<sup>24</sup>. We scanned 120 previously defined marker genes  
666 across the 185 isolate genomes from the SynCom utilizing the hmmsearch tool from the  
667 hmmer v3.1b2<sup>57</sup>. Then, we selected 47 markers that were present as single copy genes  
668 in 100% of our isolates. Next, we aligned each individual marker using MAFFT<sup>58</sup> and  
669 filtered low quality columns in the alignment using trimAl<sup>59</sup>. Then, we concatenated all  
670 filtered alignments into a super alignment. Finally, FastTree v2.1<sup>60</sup> was used to infer the  
671 phylogeny utilizing the WAG model of evolution. For the *Variovorax* relative's tree, we  
672 chose 56 markers present as single copy across 124 Burkholderiales isolates and  
673 implemented the same methodology described above.

674

675 9. Measuring how prevalent the RGI attenuation trait is across the *Variovorax* phylogeny  
676 (fig. S9A-B, data S1 and data S8)

677 a. Bacterial culture and plant-inoculation.

678 Fifteen *Variovorax* strains from across the genus' phylogeny were each co-inoculated  
679 with the RGI inducer *Arthrobacter* CL28. All 16 strains were grown in separate tubes,  
680 then washed, and OD<sub>600</sub> was adjusted to 0.01 before mixing. Pairs of strains were mixed  
681 in 1:1 ratios and spread at a total volume of 100 µL onto agar prior to seedling transfer.  
682 The experiment also included uninoculated controls and controls consisting of each of  
683 the 16 strains inoculated alone. Thus, the experiment consisted of 32 separate bacterial  
684 combinations. We performed the experiment one time, which included 3 plates per

685 bacterial combination. Upon harvest, root morphology was measured (Materials and  
686 Methods 2c). Primary root elongation was analyzed as described above (Materials and  
687 Methods 4c).

688

689 10. Measuring root growth inhibition in tomato seedlings (fig. S10 and data S9)

690 a. Experimental design

691 This experiment included the following treatments: (i) No bacteria, (ii) *Arthrobacter* CL28,  
692 (iii) *Variovorax* CL14 and (iv) *Arthrobacter* CL28 + *Variovorax* CL14. Each treatment was  
693 repeated in three separate agar plates with five tomato seedlings per plate. The  
694 experiment was repeated in two independent replicates.

695

696 b. Bacterial culture and plant-inoculation

697 All strains were grown in separate tubes, then washed, and OD<sub>600</sub> was adjusted to 0.01  
698 before mixing and spreading (Methods 3b). 400 µL of each bacterial treatment was  
699 spread on 20 X 20 agar plates containing JM agar with no sucrose.

700

701 c. In vitro plant growth conditions

702 We used Heinz 1706 seeds. All seeds were soaked in sterile distilled water for 15 min,  
703 then surface-sterilized with 70% bleach, 0.2% Tween-20 for 15 min, and rinsed five  
704 times with sterile distilled water to eliminate any seed-borne microbes on the seed  
705 surface. Seeds were stratified at 4 °C in the dark for two days. Plants were germinated  
706 on vertical square 10 X 10 cm agar plates with JM containing 0.5% sucrose, for 7 days.  
707 Then, 5 plants were transferred to each of the SynCom-inoculated agar plates. Upon

708 harvest, root morphology was measured. (Materials and Methods 2c).

709

710 c. Primary root elongation analysis.

711 Differences between treatments were indicated using the confidence letter display (CLD)

712 derived from the Tukey's post hoc test from an ANOVA model.

713

714 11. Determination of *Arthrobacter* CL28 colony forming units from roots (fig. S11 and  
715 data S10)

716 *Arabidopsis* seedlings were inoculated with (i) *Arthrobacter* CL28 alone, (ii) *Arthrobacter*

717 CL28 + *Variovorax* CL14 or (iii) *Arthrobacter* CL28 + *Variovorax* B4, as described above

718 (Material and Methods 4b). Each bacterial treatment included four separate plates, with

719 nine seedlings in each plate. Upon harvest, all seedlings were placed in pre-weighed 2

720 mL Eppendorf tubes containing three glass beads, three seedlings per tube (producing

721 12 data points per treatment). Roots were weighed, then homogenized using a bead

722 beater (MP Biomedicals). The resulting suspension was serially diluted, then plated on

723 LB agar plates containing 50 µg/mL of Apramycin and colonies were counting after

724 incubation of 48 hours at 28° C.

725

726 12. *Arabidopsis* RNA-Seq analysis (Fig. 4A-C, fig. S13 and data S11-12)

727 a. Detection of RGI-induced genes (Fig. 4A-B)

728 To measure the transcriptional response of the plant to the different SynCom

729 combinations, we used the R package DESeq2 v.1.22.1<sup>48</sup>. The raw count genes matrixes

730 for the dropout and tripartite experiments were used independently to define

731 differentially expressed genes (DEGs). For the analysis of both experiments we fitted the  
732 following model specification:

733 Abundance Gene ~ SynCom

734

735 From the fitted models we derived the following contrasts to obtain differentially  
736 expressed genes (DEGs). A gene was considered differentially expressed if it had a  $q$ -  
737 value  $< 0.1$ . For the tripartite system (Materials and Methods 4), we performed the  
738 following contrasts: *Arthrobacter* CL28 vs No Bacteria (NB) and *Arthrobacter* CL28 vs  
739 *Arthrobacter* CL28 co-inoculated with *Variovorax* CL14. The logic behind these two  
740 contrasts was to identify genes that were induced in RGI plants (*Arthrobacter* CL28 vs  
741 NB) AND repressed by *Variovorax* CL14. For the dropout system (Materials and Methods  
742 5), we performed the following contrasts, *Variovorax* drop-out vs NB, and *Variovorax*  
743 drop-out vs full SynCom. The logic behind these two contrasts was identical to the  
744 tripartite system: to identify genes that are associated with the RGI phenotype  
745 (*Variovorax* drop-out vs NB contrast) AND repressed when *Variovorax* are present  
746 (*Variovorax* drop-out vs full SynCom contrast).

747

748 For visualization purposes, we applied a variance stabilizing transformation (DESeq2) to  
749 the raw count gene matrix. We then standardized each gene expression (z-score) along  
750 the samples. We subset DEGs from this standardized matrix and calculated the mean z-  
751 score expression value for each SynCom treatment.

752

753 To identify the tissue specific expression profile of the 18 intersecting genes between

754 the tripartite and dropout systems, we downloaded the spatial expression profile of each  
755 gene from the Klepikova atlas<sup>27</sup> using the Bio-analytic resource of plant biology platform.  
756 Then, we constructed a spatial expression matrix of the 18 genes and computed  
757 pairwise Pearson correlation between all pairs of genes. Finally, we applied hierarchical  
758 clustering to this correlation matrix.

759

760 b. Comparison with acute auxin response dataset (Figure 4C)

761 We applied the variance stabilizing transformation (DESeq2) to the raw count gene  
762 matrix. We then standardized each gene expression (z-score) along the samples. From  
763 this matrix, we subsetted 12 genes that in a previous study<sup>28</sup> exhibited the highest fold  
764 change between auxin treated and untreated samples. Finally, we calculated the mean  
765 z-score expression value of each of these 12 genes across the SynCom treatments. We  
766 estimated the statistical significance of the trend of these 12 genes between a pair of  
767 SynCom treatments (Full SynCom vs *Variovorax* drop-out, *Arthrobacter* CL28 vs  
768 *Arthrobacter* CL28 plus *Variovorax* CL14) using a permutation approach: we estimated  
769 a *p*-value by randomly selecting 12 genes 10000 times from the expression matrix and  
770 comparing the mean expression between the two SynCom treatments (e.g Full SynCom  
771 vs *Variovorax* drop-out) with the actual mean expression value from the 12 genes  
772 reported as robust auxin markers.

773

774 13. Measuring the ability of *Variovorax* to attenuate RGI induced by small molecules  
775 (Figure 4D and data S13) indole-3-acetic acid (IAA), 2,4-Dichlorophenoxyacetic acid (2,4-  
776 D), ethylene (the ethylene precursor 1-Aminocyclopropane-1-carboxylic acid [ACC]),

777 cytokinins (Zeatin, 6-Benzylaminopurine) and flagellin 22 peptide (flg22) (Fig. 4d).

778 a. Bacterial culture and plant-inoculation.

779 We embedded each of the following compounds in JM plates: 100 nM Indole acetic acid  
780 (IAA, Sigma), 1  $\mu$ M IAA, 100 nM 1-Aminocyclopropane-1-carboxylic acid (ACC, Sigma),  
781 100 nM 2,4-Dichlorophenoxyacetic acid (2,4-d, Sigma), 100 nM flagellin 22 (flg22,  
782 PhytoTech labs), 100 nM 6-Benzylaminopurine (BAP, Sigma) and 100 nM Zeatin (Sigma).  
783 Plates with each compound were inoculate with one of the *Variovorax* strains CL14,  
784 MF160, B4 or YR216 or with *Burkholderia* CL11. These strains were grown in separate  
785 tubes, then washed, and OD<sub>600</sub> was adjusted to 0.01 before spreading 100  $\mu$ L on plates.  
786 In addition, we included uninoculated controls for each compound. We also included  
787 unamended JM plates inoculated with the RGI inducer *Arthrobacter* CL28 co-inoculated  
788 with each of the *Variovorax/Burkholderia* strains or alone. Thus, the experiment included  
789 42 individual treatments. The experiment was repeated twice, with three independent  
790 replicates per experiment. Upon harvest, root morphology was measured (Materials and  
791 Methods 2c).

792

793 b. Primary root elongation analysis.

794 Primary root elongation was compared between bacterial treatments within each of root  
795 growth inhibition treatments tested. Differences between treatments were estimated as  
796 described above (Materials and Methods 4c). We plotted the estimated means with 95%  
797 confidence interval of each bacterial treatment across the different RGI treatments.

798

799 14. *In vitro* growth of *Variovorax* (fig. S14)

800 *Variovorax* CL14 was grown in 5mL cultures for 40 hours at 28 °C in 1x M9 minimal salts  
801 media (Sigma M6030) supplemented with 2 mM MgSO<sub>4</sub>, 0.1 mM CaCl<sub>2</sub>, 10 μM FeSO<sub>4</sub>,  
802 and a carbon source: either 15 mM succinate alone, 0.4 mM Indole-3-acetic acid (IAA)  
803 with 0.5% Ethanol for IAA solubilization, or both. Optical density at 600 nm and IAA  
804 concentrations were measured at six time points. IAA concentrations were measured  
805 using the Salkowski method modified from<sup>61</sup>. 100 μL of Salkowski reagent (10 mM FeCl<sub>3</sub>  
806 in 35% perchloric acid) was mixed with 50 μL culture supernatant or IAA standards and  
807 color was allowed to develop for 30 min prior to measuring the absorbance at 530nm.

808

809 15. Measuring plant Auxin response *in-vivo* using a bioreporter line (Fig. 4E-F and data  
810 S14)

811 a. Bacterial culture and plant-inoculation.

812 7-day old transgenic *Arabidopsis* seedlings expressing the *DR5::GFP* reporter  
813 construct<sup>62</sup> were transferred onto plates containing: (i) 100 nM IAA, (ii) *Arthrobacter* CL28,  
814 (iii) 100 IAA + *Variovorax* CL14, (iv) *Arthrobacter* CL28 + *Variovorax* CL14, (v) the  
815 *Variovorax* drop-out SynCom, (vi) the full SynCom, (vii) uninoculated plates. For  
816 treatments ii, iii, Bacterial strains were grown in separate tubes, then washed, and OD<sub>600</sub>  
817 was adjusted to 0.01. For treatment iv, OD-adjusted cultures were mixed in 1:1 ratio and  
818 spread onto agar prior to seedling transfer. Cultures for treatments v and vi were  
819 prepared as described above (Materials and Methods 6a).

820

821 b. Fluorescence microscopy.

822 GFP fluorescence in the root elongation zone of 8-10 plants per treatment were



823 visualized using a Nikon Eclipse 80i fluorescence microscope at days 1, 3, 6, 9 and 13  
824 post inoculation. The experiment was performed in two independent replicates.

825

826 From each root imaged, 10 random 30 X 30 pixel squares were sampled and average  
827 GFP intensity was measured using imageJ<sup>49</sup>. Treatments were compared within each  
828 time point using ANOVA tests with Tukey's post hoc in the R base package emmeans.  
829 For visualization purposes we plotted the estimated means of each bacterial across the  
830 different timepoints.

831

832 16. Measuring the dual role of auxin and ethylene perception in SynCom-induced RGI  
833 (Fig. 4F and data S15)

834 a. Bacterial culture and plant-inoculation.

835 We transferred four 7-day old wild type seedling and four *axr1-2* seedlings to each plate  
836 in this experiment. The plates contained one of five bacterial treatments: (i) *Arthrobacter*  
837 CL28, (ii) *Arthrobacter* CL28 + *Variovorax* CL14, (iii) *Variovorax* drop-out SynCom, (iv) Full  
838 SynCom, (v) uninoculated, prepared as described above (Materials and Methods 15a)  
839 Plates were placed vertically inside sealed 86 X 68 cm Ziploc bags. In one of the bags,  
840 we placed an open water container with 80 2.5 gram sachets containing 0.014% 1-MCP  
841 (Ethylene Buster, Chrystal International BV). In the second bag we added, as a control,  
842 an open water container. Both bags were placed in the growth chamber for 12 days.  
843 After 6 days of growth, we added 32 additional sachets to the 1-MCP-treated bag to  
844 maintain 1-MCP concentrations in the air. Upon harvest, root morphology was measured  
845 (Materials and Methods 2c).

846

847 b. Primary root elongation analysis.

848 Primary root elongation was standardized to the No bacteria control of each genotype,  
849 and compared between genotype/1-MCP treatments within the *Arthrobacter* CL28  
850 treatment and the *Variovorax* drop-out SynCom treatment, independently. Differences  
851 between treatments were estimated as described above (Materials and Methods 4c). We  
852 plotted the estimated means with 95% CI of each bacterial treatment across the four  
853 genotypes. We calculated the interquartile range for the Full and *Arthrobacter*  
854 CL28/*Variovorax* CL14 treatments pooling the four genotypes/treatments.

855

856 17. Preparation of binarized plant images (Fig 2C, 3B and fig. S5-S6)

857 To present representative root images, we increased contrast and subtracted  
858 background in imageJ, then cropped the image to select representative roots.  
859 Neighboring roots were manually erased from the cropped image.

860

861 18. Mining *Variovorax* genomes for auxin degradation operons and ACC-deaminase  
862 genes.

863 We used local alignment (BLASTp) to search for the presence of the 10 genes  
864 (*iacABCDEFGHIY*) from a previously characterized auxin degradation operon in a  
865 different genus<sup>18</sup> across the 10 *Variovorax* isolates in our SynCom. A minimal set of 7 of  
866 these genes (*iacABCDEFI*) was shown to be necessary and sufficient for auxin  
867 degradation<sup>18</sup>. We identified homologs for these genes across the *Variovorax* phylogeny  
868 (Extended Figure 5a) at relatively low sequence identity (27-48%). Two genes of the

869 minimal set of 7 genes did not have any homologs in most *Variovorax* genomes (*iacB*  
870 and *iacI*). In addition to the *iac* operon, we scanned the genomes for the auxin  
871 degradation operon described by Ebenau-Jehle et al<sup>63</sup> and could not identify it in any of  
872 the *Variovorax* isolates.

873

874 We also searched for the ACC deaminase gene by looking for the KEGG orthology id  
875 K01505 (1-aminocyclopropane-1-carboxylate deaminase) across the IMG annotations  
876 available for all our genomes.

877

878 19. *Variovorax* CL14 RNA-Seq in monoculture and in co-culture with *Arthrobacter* CL28

879 a. Bacterial culture

880 *Variovorax* CL14 was grown either alone or in co-culture with *Arthrobacter* CL28 in 5mL  
881 of 1/10 2xYT medium (1.6 g/L tryptone, 1 g/L yeast extract, 0.5 g/L NaCl) in triplicate.  
882 The mono-culture was inoculated at OD<sub>600</sub> of 0.02 and the co-culture was inoculated  
883 with OD<sub>600</sub> of 0.01 of each strain. Cultures were grown at 28°C to early stationary phase  
884 (approximately 22 hours) and cells were harvested by centrifugation at 4100 x g for 15  
885 min and frozen at -80°C prior to RNA extraction.

886

887 b. RNA extraction and RNA-Seq

888 Cells were lysed for RNA extraction using TRIzol Reagent (Invitrogen) according to the  
889 manufacturer instructions. Following cell lysis and phase separation, RNA was purified  
890 using the RNeasy Mini kit (Qiagen) including the optional on column DNase Digestion  
891 with the RNase-Free DNase Set (Qiagen). Total RNA quality was confirmed on the 2100

892 Bioanalyzer instrument (Agilent) and quantified using a Qubit 2.0 fluorometer (Invitrogen).  
893 RNA-Seq libraries were prepared using the Universal Prokaryotic RNA-Seq, Prokaryotic  
894 AnyDeplete kit (Tecan, formerly NuGEN). Libraries were pooled and sequenced on the  
895 Illumina HiSeq4000 platform to generate 50-bp single-end reads.

896

#### 897 c. RNA-Seq analysis

898 We mapped the generated raw reads to the *Variovorax* CL14 genome (fasta file available  
899 on [github.com/isaig/variovoraxRGI](https://github.com/isaig/variovoraxRGI)) using bowtie2 with the 'very-sensitive' flag. We  
900 then counted hits to each individual coding sequence (CDS) annotated for the *Variovorax*  
901 CL14 genome using the function featureCounts from the R package Rsubread, inputting  
902 the *Variovorax* CL14 gff file (available on [github.com/isaig/variovoraxRGI](https://github.com/isaig/variovoraxRGI)) and using the  
903 default parameters with the flag allowMultiOverlap=FALSE. Finally, we used DESeq2 to  
904 estimate differentially expressed genes (DEGs) between treatments with the  
905 corresponding fold change estimates and false discovery adjusted p-values.

906

### 907 20. *Variovorax* CL14 genomic library construction and screening

#### 908 a. Library construction

909 High molecular weight *Variovorax* CL14 genomic DNA was isolated by phenol-  
910 chloroform extraction. This genomic DNA was partially digested with Sau3A1 (New  
911 England Biolabs), and separated on the BluePippin (Sage Science) to isolate DNA  
912 fragments >12.5 kb. Vector backbone was prepared by amplifying pBBR-1MCS2<sup>64</sup>  
913 using Phusion polymerase (New England Biolabs) with primers JMC277-JMC278  
914 (Supplementary Table 19), digesting the PCR product with BamHI-HF (New England

915 Biolabs), dephosphorylating with Quick CIP (New England Biolabs), and gel extracting  
916 using the QIAquick Gel Extraction Kit (Qiagen). The prepared *Variovorax* CL14 genomic  
917 DNA fragments were ligated to the prepared pBBR1-MCS2 vector backbone using  
918 ElectroLigase (New England Biolabs) and transformed by electroporation into NEB 10-  
919 beta Electrocompetent *E. coli* (New England Biolabs). Clones were selected by blue-  
920 white screening on LB plates containing 1.5% agar, 50 µg/mL kanamycin, 40 µg/mL X-  
921 gal (5-bromo-4-chloro-3-indolyl-β-D-galactopyranoside), and 1 mM Isopropyl β- d-1-  
922 thiogalactopyranoside (IPTG) at 37°C. White colonies were screened by colony PCR  
923 using Taq polymerase and JMC247-JMC270 primers (Supplementary Table 19) to  
924 eliminate clones with small inserts. The screened library clones were picked into LB  
925 media + 50 µg/mL kanamycin, grown at 37°C, and stored at -80°C in 20% glycerol. The  
926 *Variovorax* CL14 genomic library comprises approximately 3,500 clones with inserts  
927 >12.5 kb in vector pBBR1-MCS2 in NEB 10-beta *E. coli*.

928

#### 929 b. Library screening for IAA degradation

930 To screen the *Variovorax* CL14 genomic library for IAA degradation, the *E. coli* clones  
931 were grown in LB media containing 50 µg/mL kanamycin, 1 mM IPTG, 0.05 mg/mL IAA,  
932 and 0.25% ethanol from IAA solubilization for 3 days at 37°C. Salkowski reagent (10 mM  
933 FeCl<sub>3</sub> in 35% perchloric acid) was mixed with culture supernatant 2:1 and color was  
934 allowed to develop for 30 min prior to measuring the absorbance at 530nm. Two clones  
935 from the library (plate 8 well E8 and plate2 well F10, henceforth Vector 1 and Vector 2,  
936 respectively) were identified as degrading IAA. The *Variovorax* CL14 genes contained in  
937 Vectors 1 and 2 were inferred by isolating plasmid from these clones using the

938 ZymoPURE II Plasmid Midiprep Kit (Zymo Research) and Sanger sequencing the insert  
939 ends using primers JMC247 and JMC270 (Supplementary Table 19). Double digest of  
940 the purified plasmids with *SacI* and *EcoRV* confirmed the size of the inserts. Vector 1  
941 contains a 35 kb insert and Vector 2 contains a 15kb insert (nucleotide coordinates  
942 29100-64406 and 52627-67679, respectively, from *Variovorax* CL14 scaffold  
943 Ga0102008\_10005 (Fig. 5a). The genes in both inserts are in the same direction as the  
944 IPTG inducible *Lac* promoter used to drive *LacZ*-alpha expression for blue-white  
945 screening on pBBR1-MCS2.

946

947 21. *Acidovorax* Root219::EV and *Acidovorax* Root219::V2 construction and screening  
948 Triparental mating was used to mobilize Vector 2 or control empty vector (EV) pBBR1-  
949 MCS2 from *E. coli* to *Acidovorax* Root219. Donor NEB 10-beta *E. coli* containing the  
950 vector for conjugation and helper strain *E. coli* pRK2013<sup>65</sup> were grown in LB medium  
951 containing 50 µg/mL kanamycin at 37°C. *Acidovorax* Root219 was grown in 2xYT  
952 medium containing 100 µg/mL ampicillin at 28°C. Bacteria were washed 3 times with  
953 2xYT medium without antibiotics, mixed in a ratio of approximately 1:1:10  
954 donor:helper:recipient, centrifuged and resuspended in 1/10 the volume and plated as a  
955 pool on LB agar plates without antibiotics and grown at 28°C. 18-30 hours later,  
956 exconjugantes were streaked on LB agar plates containing 50 µg/mL kanamycin and  
957 100 µg/mL ampicillin to select only *Acidovorax* Root219 containing the conjugated  
958 vector. The resulting strains are designated *Acidovorax* Root219-EV containing empty  
959 vector pBBR1-MCS2 and *Acidovorax* Root219-V2 containing Vector 2 (Methods 20b). *In*  
960 *vitro* IAA degradation was performed as in Methods 14 using M9 media with carbon

961 sources: 15 mM succinate, 0.1 mg/mL indole-3-acetic acid (IAA), and 0.5% Ethanol with  
962 the addition of 50 µg/mL kanamycin and 1mM IPTG. Primary root elongation  
963 measurement was performed as in Methods 2c on MS medium with 1mM IPTG and RGI  
964 induced by either 1µM IAA or *Arthrobacter* CL28.

965

## 966 21. *Variovorax* hotspot 33 knockout construction and screening

967 The unmarked deletion mutant *Variovorax* CL14  $\Delta$ 2643613653-2643613677 (*Variovorax*  
968 CL14 $\Delta$ HS33) was constructed based on a genetic system developed for *Burkholderia*  
969 spp. and its suicide vector pMo130<sup>66</sup>

970

### 971 a. Knockout suicide vector pJMC158 construction

972 The vector backbone was amplified from pMo130 using primers JMC203-JMC204  
973 (Supplementary Table 19) with Q5 DNA polymerase (New England Biolabs), cleaned up  
974 and treated with DpnI (New England Biolabs). 1Kb regions for homologous  
975 recombination flanking *Variovorax* CL14 genes 2643613653-2643613677 were amplified  
976 using Q5 Polymerase (New England Biolabs) and primers JMC533-JMC534 and  
977 JMC535-JMC536 (Supplementary Table 19). The vector was assembled with Gibson  
978 Assembly Mastermix (New England Biolabs) at 50°C for 1 hour, transformed into NEB 5-  
979 alpha chemically competent *E. coli* (New England Biolabs), and plated on LB agar with  
980 50 µg/mL kanamycin. pJMC158 DNA was isolated from a clone using the ZR Plasmid  
981 Miniprep Classic Kit (Zymo Research), sequence confirmed, and transformed into bi-  
982 parental mating strain *E. coli* WM3064. *E. coli* strain WM3064 containing pJMC158 was  
983 maintained on LB containing 50 µg/mL kanamycin and 0.3mM diaminopimelic acid (DAP)

984 at 37°C.

985 b. Conjugative transfer of pJMC158 into *Variovorax* CL14

986 For biparental mating, *E. coli* WM3064 was grown as above, and *Variovorax* CL14 was  
987 grown in 2xYT medium containing 100 µg/mL ampicillin. Each strain was washed  
988 separately 3 times with 2xYT medium, then mixed at ratios between 1:1-1:10  
989 donor:recipient, centrifuged and resuspended in approximately 1/10 the volume and  
990 plated in a single pool on LB agar containing 0.3mM DAP and grown at 28°C overnight.  
991 Exconjugants were streaked onto LB plates containing 100 µg/mL ampicillin 50 µg/mL  
992 kanamycin lacking DAP and grown at 28°C to select *Variovorax* CL14 strains that  
993 incorporated suicide vector pJMC158. First crossover strains were subsequently purified  
994 once by re-streaking and then individual colonies grown in LB with 100 µg/mL ampicillin  
995 50 µg/mL kanamycin.

996

997 c. Resolution of pJMC158 integration and knockout strain purification and verification

998 To resolve the integration of pJMC158, first crossover strains were grown once in LB  
999 medium containing 100 µg/mL ampicillin and 1 mM IPTG then plated on media  
1000 containing 10 g/L tryptone, 5 g/L yeast extract, 100 g/L sucrose, 1.5% agar, 100 µg/mL  
1001 ampicillin and 1 mM IPTG. Colonies were picked into the same liquid media and grown  
1002 once. The resulting strains were screened by PCR using Q5 polymerase for deletion of  
1003 genes 2643613653-2643613677 using primers JMC568-JMC569 (Supplementary Table  
1004 19). These strains were subsequently plate purified at least 3 times on LB 100 µg/mL  
1005 ampicillin plates. To ensure strain purity, PCR primers were designed to amplify from  
1006 outside into the genes that were deleted (primer pairs JMC571-JMC569 and JMC568-



1007 JMC570, Supplementary Table 19). These PCR reactions were performed using Q5  
1008 polymerase with wild type *Variovorax* CL14 as a control. All genomic DNA used for  
1009 screening PCR was isolated using the Quick-DNA miniprep kit (Zymo Research). The  
1010 resulting knockout strain was designated *Variovorax* CL14 $\Delta$ H533.

1011

1012 d. Screening of *Variovorax* CL14  $\Delta$ H533

1013 *In vitro* IAA degradation was performed as in Methods 14 using M9 media with carbon  
1014 sources: 15 mM succinate, 0.1 mg/mL indole-3-acetic acid (IAA), and 0.5% Ethanol.  
1015 Primary root elongation measurement was performed as in Methods 2c on MS medium  
1016 with 1mM IPTG and RGI induced by either 1 $\mu$ M IAA or *Arthrobacter* CL28.

1017

## 1018 **References**

- 1019 1. Hiruma, K. *et al.* Root Endophyte *Colletotrichum tofieldiae* Confers Plant Fitness  
1020 Benefits that Are Phosphate Status Dependent. *Cell* **165**, 464–474 (2016).
- 1021 2. Castrillo, G. *et al.* Root microbiota drive direct integration of phosphate stress  
1022 and immunity. *Nature* **543**, (2017).
- 1023 3. Durán, P. *et al.* Microbial Interkingdom Interactions in Roots Promote  
1024 *Arabidopsis* Survival. *Cell* **175**, 973-983.e14 (2018).
- 1025 4. Herrera Paredes, S. *et al.* Design of synthetic bacterial communities for  
1026 predictable plant phenotypes. *PLOS Biol.* **16**, e2003962 (2018).
- 1027 5. Huang, A. C. *et al.* A specialized metabolic network selectively modulates  
1028 *Arabidopsis* root microbiota. *Science* **364**, eaau6389 (2019).

- 1029 6. Lundberg, D. S. *et al.* Defining the core *Arabidopsis thaliana* root microbiome.  
1030 *Nature* **488**, 86–90 (2012).
- 1031 7. Hogenhout, S. A., Van der Hoorn, R. A. L., Terauchi, R. & Kamoun, S. Emerging  
1032 Concepts in Effector Biology of Plant-Associated Organisms. *Mol. Plant-Microbe*  
1033 *Interact.* **22**, 115–122 (2009).
- 1034 8. Faure, D., Vereecke, D. & Leveau, J. H. J. Molecular communication in the  
1035 rhizosphere. *Plant Soil* **321**, 279–303 (2009).
- 1036 9. Herrera Paredes, S. *et al.* Design of synthetic bacterial communities for  
1037 predictable plant phenotypes. *PLoS Biol.* **16**, (2018).
- 1038 10. Mylona, P., Pawlowski, K. & Bisseling, T. Symbiotic Nitrogen Fixation. *Plant Cell*  
1039 **7**, 869–885 (1995).
- 1040 11. Carlström, C. I. *et al.* Synthetic microbiota reveal priority effects and keystone  
1041 strains in the *Arabidopsis* phyllosphere. *Nat. Ecol. Evol.* **3**, 1445–1454 (2019).
- 1042 12. Helman, Y. & Chernin, L. Silencing the mob: disrupting quorum sensing as a  
1043 means to fight plant disease. *Mol. Plant Pathol.* **16**, 316–329 (2015).
- 1044 13. Leveau, J. H. J. & Lindow, S. E. Utilization of the plant hormone indole-3-acetic  
1045 acid for growth by *Pseudomonas putida* strain 1290. *Appl. Environ. Microbiol.*  
1046 **71**, 2365–71 (2005).
- 1047 14. Zúñiga, A. *et al.* Quorum Sensing and Indole-3-Acetic Acid Degradation Play a  
1048 Role in Colonization and Plant Growth Promotion of *Arabidopsis thaliana* by  
1049 *Burkholderia phytofirmans* PsJN. *Mol. Plant-Microbe Interact.* **26**, 546–553

- 1050 (2013).
- 1051 15. Leadbetter, J. R. & Greenberg, E. P. Metabolism of acyl-homoserine lactone  
1052 quorum-sensing signals by *Variovorax paradoxus*. *J. Bacteriol.* **182**, 6921–6  
1053 (2000).
- 1054 16. Sun, S.-L. *et al.* The Plant Growth-Promoting Rhizobacterium *Variovorax*  
1055 *boronicumulans* CGMCC 4969 Regulates the Level of Indole-3-Acetic Acid  
1056 Synthesized from Indole-3-Acetonitrile. *Appl. Environ. Microbiol.* **84**, e00298-18  
1057 (2018).
- 1058 17. Gilbert, S. *et al.* Bacterial production of indole related compounds reveals their  
1059 role in association between duckweeds and endophytes. *Front. Chem.* **6**, (2018).
- 1060 18. Donoso, R. *et al.* Biochemical and Genetic Bases of Indole-3-Acetic Acid (Auxin  
1061 Phytohormone) Degradation by the Plant-Growth-Promoting Rhizobacterium  
1062 *Paraburkholderia phytofirmans* PsJN. *Appl. Environ. Microbiol.* **83**, e01991-16  
1063 (2017).
- 1064 19. Leveau, J. H. J. & Gerards, S. Discovery of a bacterial gene cluster for  
1065 catabolism of the plant hormone indole 3-acetic acid. *FEMS Microbiol. Ecol.* **65**,  
1066 238–250 (2008).
- 1067 20. Ludwig-Müller, J. Bacteria and fungi controlling plant growth by manipulating  
1068 auxin: balance between development and defense. *J. Plant Physiol.* **172**, 4–12  
1069 (2015).
- 1070 21. Brumos, J. *et al.* Local Auxin Biosynthesis Is a Key Regulator of Plant

- 1071 Development. *Dev. Cell* **47**, 306-318.e5 (2018).
- 1072 22. Edwards, J. A. *et al.* Compositional shifts in root-associated bacterial and  
1073 archaeal microbiota track the plant life cycle in field-grown rice. *PLOS Biol.* **16**,  
1074 e2003862 (2018).
- 1075 23. Fitzpatrick, C. R. *et al.* Assembly and ecological function of the root microbiome  
1076 across angiosperm plant species. *Proc. Natl. Acad. Sci. U. S. A.* **115**, E1157–  
1077 E1165 (2018).
- 1078 24. Levy, A. *et al.* Genomic features of bacterial adaptation to plants. *Nat. Genet.* **50**,  
1079 138–150 (2018).
- 1080 25. Kremer, J. M. *et al.* FlowPot axenic plant growth system for microbiota research.  
1081 *bioRxiv* 254953 (2018). doi:10.1101/254953
- 1082 26. Bai, Y. *et al.* Functional overlap of the Arabidopsis leaf and root microbiota.  
1083 *Nature* **528**, 364–369 (2015).
- 1084 27. Klepikova, A. V., Kasianov, A. S., Gerasimov, E. S., Logacheva, M. D. & Penin, A.  
1085 A. A high resolution map of the *Arabidopsis thaliana* developmental  
1086 transcriptome based on RNA-seq profiling. *Plant J.* **88**, 1058–1070 (2016).
- 1087 28. Uchida, N. *et al.* Chemical hijacking of auxin signaling with an engineered auxin–  
1088 TIR1 pair. *Nat. Chem. Biol.* **14**, 299–305 (2018).
- 1089 29. Takase, T. *et al.* *ydk1-D*, an auxin-responsive *GH3* mutant that is involved in  
1090 hypocotyl and root elongation. *Plant J.* **37**, 471–483 (2004).
- 1091 30. Chen, L., Dodd, I. C., Theobald, J. C., Belimov, A. A. & Davies, W. J. The

- 1092 rhizobacterium *Variovorax paradoxus* 5C-2, containing ACC deaminase,  
1093 promotes growth and development of *Arabidopsis thaliana* via an ethylene-  
1094 dependent pathway. *J. Exp. Bot.* **64**, 1565–1573 (2013).
- 1095 31. Cary, A. J., Liu, W. & Howell, S. H. Cytokinin action is coupled to ethylene in its  
1096 effects on the inhibition of root and hypocotyl elongation in *Arabidopsis thaliana*  
1097 seedlings. *Plant Physiol.* **107**, 1075–82 (1995).
- 1098 32. Gómez-Gómez, L., Felix, G. & Boller, T. A single locus determines sensitivity to  
1099 bacterial flagellin in *Arabidopsis thaliana*. *Plant J.* **18**, 277–284 (1999).
- 1100 33. Nagpal, P. *et al.* AXR2 encodes a member of the Aux/IAA protein family. *Plant*  
1101 *Physiol.* **123**, 563–74 (2000).
- 1102 34. Hall, A. E., Findell, J. L., Schaller, G. E., Sisler, E. C. & Bleecker, A. B. Ethylene  
1103 perception by the ERS1 protein in *Arabidopsis*. *Plant Physiol.* **123**, 1449–58  
1104 (2000).
- 1105 35. Gould, S. J. & Vrba, E. S. Exaptation—a Missing Term in the Science of Form.  
1106 *Paleobiology* **8**, 4–15 (1982).
- 1107 36. Bardoel, B. W. *et al.* *Pseudomonas* Evades Immune Recognition of Flagellin in  
1108 Both Mammals and Plants. *PLoS Pathog.* **7**, e1002206 (2011).
- 1109 37. Carlström, C. I. *et al.* Synthetic microbiota reveal priority effects and keystone  
1110 strains in the *Arabidopsis* phyllosphere. *Nat. Ecol. Evol.* **3**, 1445–1454 (2019).
- 1111 38. Thiergart, T. *et al.* Root microbiota assembly and adaptive differentiation among  
1112 European *Arabidopsis* populations. *bioRxiv* 640623 (2019). doi:10.1101/640623

- 1113 39. Finkel, O. M. *et al.* The effects of soil phosphorus content on plant microbiota are  
1114 driven by the plant phosphate starvation response. *PLOS Biol.* **17**, e3000534  
1115 (2019).
- 1116 40. Lundberg, D. S., Yourstone, S., Mieczkowski, P., Jones, C. D. & Dangl, J. L.  
1117 Practical innovations for high-throughput amplicon sequencing. *Nat. Methods*  
1118 **10**, 999–1002 (2013).
- 1119 41. Yourstone, S. M., Lundberg, D. S., Dangl, J. L. & Jones, C. D. MT-Toolbox:  
1120 Improved amplicon sequencing using molecule tags. *BMC Bioinformatics* **15**,  
1121 (2014).
- 1122 42. Joshi, N. & Fass, J. Sickle: A sliding-window, adaptive, quality-based trimming  
1123 tool for FastQ files (Version 1.33) [Software]. Available at  
1124 <https://github.com/najoshi/sickle>. (2011).
- 1125 43. Edgar, R. C. Search and clustering orders of magnitude faster than BLAST.  
1126 *Bioinformatics* **26**, 2460–2461 (2010).
- 1127 44. Edgar, R. C. UPARSE: highly accurate OTU sequences from microbial amplicon  
1128 reads. *Nat. Methods* **10**, 996–998 (2013).
- 1129 45. Wang, Q., Garrity, G. M., Tiedje, J. M. & Cole, J. R. Naive Bayesian Classifier for  
1130 Rapid Assignment of rRNA Sequences into the New Bacterial Taxonomy. *Appl.*  
1131 *Environ. Microbiol.* **73**, 5261–5267 (2007).
- 1132 46. DeSantis, T. Z. *et al.* Greengenes, a chimera-checked 16S rRNA gene database  
1133 and workbench compatible with ARB. *Appl. Environ. Microbiol.* **72**, 5069–72

- 1134 (2006).
- 1135 47. Oksanen, J. *et al.* Package 'vegan'. (2015).
- 1136 48. Love, M. I., Huber, W. & Anders, S. Moderated estimation of fold change and  
1137 dispersion for RNA-seq data with DESeq2. *Genome Biol.* **15**, 550 (2014).
- 1138 49. Schindelin, J. *et al.* Fiji: an open-source platform for biological-image analysis.  
1139 *Nat. Methods* **9**, 676–682 (2012).
- 1140 50. Package 'emmeans' Type Package Title Estimated Marginal Means, aka Least-  
1141 Squares Means. (2019). doi:10.1080/00031305.1980.10483031
- 1142 51. Logemann, J., Schell, J. & Willmitzer, L. Improved method for the isolation of  
1143 RNA from plant tissues. *Anal. Biochem.* **163**, 16–20 (1987).
- 1144 52. S, undefined A. Babraham Bioinformatics - FastQC A Quality Control tool for  
1145 High Throughput Sequence Data. 3–5 (2018).
- 1146 53. Bolger, A. M., Lohse, M. & Usadel, B. Trimmomatic: a flexible trimmer for Illumina  
1147 sequence data. *Bioinformatics* **30**, 2114–20 (2014).
- 1148 54. Kim, D., Langmead, B. & Salzberg, S. L. HISAT: a fast spliced aligner with low  
1149 memory requirements. *Nat. Methods* **12**, 357–60 (2015).
- 1150 55. Liao, Y., Smyth, G. K. & Shi, W. The Subread aligner: fast, accurate and scalable  
1151 read mapping by seed-and-vote. *Nucleic Acids Res.* **41**, e108 (2013).
- 1152 56. Ewels, P., Magnusson, M., Lundin, S. & Källér, M. MultiQC: summarize analysis  
1153 results for multiple tools and samples in a single report. *Bioinformatics* **32**, 3047–  
1154 3048 (2016).

- 1155 57. Wheeler, T. J. & Eddy, S. R. nhmmer: DNA homology search with profile HMMs.  
1156 *Bioinformatics* **29**, 2487–2489 (2013).
- 1157 58. Katoh, K. & Standley, D. M. MAFFT multiple sequence alignment software  
1158 version 7: improvements in performance and usability. *Mol. Biol. Evol.* **30**, 772–  
1159 80 (2013).
- 1160 59. Capella-Gutiérrez, S., Silla-Martínez, J. M. & Gabaldón, T. trimAl: a tool for  
1161 automated alignment trimming in large-scale phylogenetic analyses.  
1162 *Bioinformatics* **25**, 1972–3 (2009).
- 1163 60. Price, M. N., Dehal, P. S. & Arkin, A. P. FastTree 2 – Approximately Maximum-  
1164 Likelihood Trees for Large Alignments. *PLoS One* **5**, e9490 (2010).
- 1165 61. Gordon, S. A. & Weber, R. P. COLORIMETRIC ESTIMATION OF INDOLEACETIC  
1166 ACID. *Plant Physiol.* **26**, 192–5 (1951).
- 1167 62. Friml, J. *et al.* Efflux-dependent auxin gradients establish the apical–basal axis of  
1168 *Arabidopsis*. *Nature* **426**, 147–153 (2003).
- 1169 63. Ebenau-Jehle, C. *et al.* Anaerobic metabolism of indoleacetate. *J. Bacteriol.* **194**,  
1170 2894–2903 (2012).
- 1171 64. Kovach, M. E. *et al.* Four new derivatives of the broad-host-range cloning vector  
1172 pBBR1MCS, carrying different antibiotic-resistance cassettes. *Gene* **166**, 175–  
1173 176 (1995).
- 1174 65. Figurski, D. H. & Helinski, D. R. Replication of an origin-containing derivative of  
1175 plasmid RK2 dependent on a plasmid function provided in trans. *Proc. Natl.*



1176 *Acad. Sci. U. S. A.* **76**, 1648–1652 (1979).

1177 66. Hamad, M. A., Zajdowicz, S. L., Holmes, R. K. & Voskuil, M. I. An allelic  
1178 exchange system for compliant genetic manipulation of the select agents  
1179 *Burkholderia pseudomallei* and *Burkholderia mallei*. *Gene* **430**, 123–131 (2009).

1180

1181 **Acknowledgments:** We thank Stratton Barth, Julia Shen, May Priegel, Dilan Chudasma,  
1182 Darshana Panda, Izabella Castillo, Nicole Del Risco, and Chloe Lindberg for technical  
1183 assistance; Dale Pelletier, DOE-ORNL and Paul Schulze-Lefert, MPIPZ, Koeln, Germany  
1184 for strains; the Dangl lab microbiome group for useful discussions; Anna Stepanova,  
1185 Jose Alonso, Javier Brumos (North Carolina State University, USA), Joseph Kieber,  
1186 Jason Reed (UNC Chapel Hill), and Isaac Greenhut (University of California, Davis) for  
1187 useful discussions and Derek Lundberg (Max Planck Institute for Developmental Biology,  
1188 Tübingen, Germany), and Anthony Bishopp (University of Nottingham, UK) for critical  
1189 comments on the manuscript. **Funding:** This work was supported by NSF INSPIRE grant  
1190 IOS-1343020 and by Office of Science (BER), U.S. Department of Energy, Grant DE-  
1191 SC0014395 to J.L.D. J.L.D. is an Investigator of the Howard Hughes Medical Institute,  
1192 supported by the HHMI. O.M.F. was supported by NIH NRSA Fellowship F32-GM117758.

1193 **Author contributions:** Conceptualization: O.M.F., I.S.G, G.C., J.L.D.; Methodology:  
1194 O.M.F., I.S.G, G.C., T.F.L., J.M.C., P.J.P.L.T., E.D.W., C.R.F.; Software: I.S.G.;  
1195 Validation: O.M.F., I.S.G, G.C., T.F.L., J.M.C.; Formal analysis: I.S.G, O.M.F., G.C.;  
1196 Investigation: O.M.F., I.S.G, G.C., T.F.L., J.M.C., P.J.P.L.T., E.D.W., C.R.F; Resources:  
1197 J.L.D.; Data Curation: I.S.G, O.M.F.; Writing – original draft: O.M.F, I.S.G, G.C., J.M.C.;

1198 Writing – review and editing: T.F.L., C.D.J., J.L.D.; Visualization: I.S.G, O.M.F., G.C.;

1199 Supervision: J.L.D, C.D.J.; Project administration: J.L.D.; Funding acquisition: J.L.D.

1200 **Competing interests:** J.L.D. is a co-founder of, and shareholder in, AgBiome LLC, a

1201 corporation whose goal is to use plant-associated microbes to improve plant

1202 productivity

1203

1204 **Data and materials availability:**

1205 The 16S rRNA amplicon sequencing data associated with this study was deposited in

1206 the NCBI SRA archive under the project accession PRJNA543313. The raw

1207 transcriptomic data was deposited in the Gene Expression Omnibus (GEO) under the

1208 accession GSE131158. In addition to the supplementary tables, we deposited all scripts

1209 and additional data structures required to reproduce the results of this study in the

1210 following GitHub repository: <https://github.com/isaig/variovoraxRGI>
